# Supplementary material for: Fabclavine diversity in Xenorhabdus bacteria
Source: PubMed Central journal article supplement (PMC7214866; doi:10.3762/bjoc.16.84), 2020-05-07
Supplement: Beilstein_J_Org_Chem-16-956-s001.pdf [file Beilstein_J_Org_Chem-16-956-s001.pdf]

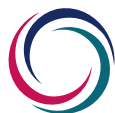

## Supporting Information

for

### **Fabclavine diversity in *Xenorhabdus* bacteria**

Sebastian L. Wenski, Harun Cimen, Natalie Berghaus, Sebastian W. Fuchs, Selcuk Hazir and Helge B. Bode

*Beilstein J. Org. Chem.* **2020**, *16*, 956–965. [doi:10.3762/bjoc.16.84](https://doi.org/10.3762/bjoc.16.84)

### **Material and methods, supplementary figures and tables, and MALDI–HRMS and MALDI–MS<sup>2</sup> spectra**

## 1 **Material and methods**

### 2 **1. Strain cultivation for MALDI–MS experiments**

3 The strains were cultivated as described previously [1]: Briefly, all *Xenorhabdus* and  
4 *Photorhabdus* strains were grown on lysogeny broth (LB) agar plates at 30 °C. The  
5 production cultures were inoculated 1:25 with overnight cultures in fresh LB medium and  
6 incubated shaking at 30 °C for three days. *Escherichia coli* strains were grown on LB agar  
7 plates and in LB medium at 37 °C with shaking. If appropriate, kanamycin (50 µg/mL) or  
8 L-(+)-arabinose (0.2%) were added. The cultures were harvested as whole cell cultures  
9 and stored at –20 °C.

10

### 11 **2. Isotope labeling and reverse feeding experiments**

12 For the isotope-labeling experiments, overnight cultures were washed three times with  
13 H<sub>2</sub>O and inoculated 1:100 in ISOGRO®-13C (Sigma-Aldrich). If appropriate, kanamycin  
14 and L-(+)-arabinose (0.2%) were added, and the cultures were incubated shaking at 30  
15 °C for 2 d. For reverse feeding experiments, 2 mM of the substrate was added each day.

16

### 17 **3. Generation of promoter-exchange mutants**

18 The promoter-exchange mutants were generated as described previously [1]: Briefly,  
19 about 600–1200 bp of the starting *fc/C* (homologues) were amplified (the corresponding  
20 oligonucleotides are listed in Table S1), cloned into the pCEP\_Kan backbone (pCEP:  
21 cluster expression plasmid) by hot fusion assembly, and transformed into *E. coli* S17-1  
22 λpir or ST18 as described previously [2-5]. After the conjugation with the corresponding  
23 *E. coli* ST18/S17 strains, the kanamycin-resistant conjugants were confirmed by colony  
24 PCR or by MALDI–MS for a successful promoter exchange.

25

### 26 **4. MALDI–MS**

27 MALDI–MS experiments were performed as described previously [1]: Briefly, 0.3 µL of a  
28 liquid culture were mixed on a MALDI target with 0.25 µL 1:10 diluted ProteoMass Normal  
29 Mass Calibration Mix (ProteoMass™ MALDI Calibration Kit, Sigma-Aldrich) for internal  
30 calibration and 0.9 µL α-cyano-4-hydroxycinnamic acid (CHCA) matrix (3 mg/mL in 75%  
31 acetonitrile, 0.1% trifluoroacetic acid). After drying, the resulting spot was coated with 5%  
32 formic acid, and after removal of the 5% formic acid solution mixed again with 0.6 µL

33 CHCA. Cell MALDI measurements were performed with a MALDI LTQ Orbitrap XL  
34 (Thermo Fisher Scientific, Inc., Waltham, MA) instrument (nitrogen laser at 337 nm in  
35 FTMS scan mode) with 100 shots per measurement with high resolution. Alternatively, 4-  
36 chloro- $\alpha$ -cyanocinnamic acid can be used as the matrix, but we observed a decreased  
37 quality of the resulting spectra. The CID mode using the ITMS scan mode was used for  
38 MALDI-MS<sup>2</sup> experiments, with the same sample preparation having the following  
39 parameters: Normalized collision energy: 28–32, Act. Q: 0.250, Act. Time (ms): 30.0. The  
40 data were analyzed using Qual Browser version 2.0.7 (Thermo Fisher Scientific). As the  
41 signal intensities of the stacked spectra were normalized and the intensity is displayed by  
42 the relative abundance in a range from 0 to 100%, the y axis is not shown. Since not all  
43 detected signals could be detected with a sufficient signal intensity to confirm them by  
44 MS<sup>2</sup> experiments, we decided to show them in the supplementary figures of the  
45 corresponding strain, but without a compound number.

46

## 47 **5. Bioactivity analysis**

### 48 **5.1 Generating cell-free supernatant**

49 The promoter-exchange mutant strains were cultivated on LB agar, supplemented with a  
50 50  $\mu$ g/mL final concentration of kanamycin, and incubated at 30 °C for 48 h. A single  
51 colony was transferred into 10 mL LB medium, supplemented with a 50  $\mu$ g/mL final  
52 concentration of kanamycin to obtain a culture overnight at 200 rpm and 30 °C. The optical  
53 densities of the overnight cultures (20 mL LB) were measured at 600 nm. The final OD of  
54 the cultures was adjusted to 0.1 after inoculation. For each strain, two flasks were  
55 prepared, and the cultures were incubated at 30 °C for 1 h. One of the flasks was induced  
56 with 0.2% L-arabinose, and the other flask was not treated with arabinose (non-induced).  
57 All induced and non-induced cultures were incubated for 24 h at 200 rpm and 30 °C. Wild  
58 type strains were grown on LB agar at 30 °C for 48 h. A single colony was transferred in  
59 10 mL LB medium and incubated overnight at 30 °C in a rotary shaker at 200 rpm to  
60 generate precultures. The LB medium was inoculated 1:100 with the preculture and  
61 cultivated at 200 rpm and 30 °C for 72 h. The bacterial broth was harvested by  
62 centrifugation at 10,000 rpm for 10 min, and the supernatant was filtered through a 0.22  
63  $\mu$ m millipore filter (Thermo scientific).

64

## 65 **5.2 Agar well-diffusion bioassay**

66 The antibacterial activity of the wild type, induced, and noninduced promoter-exchange  
67 mutant supernatants was determined by the agar well-diffusion method [6]. *Escherichia*  
68 *coli* (ATCC 25922), *Enterococcus faecalis* (ATCC 29212), *Staphylococcus aureus* (ATCC  
69 29213), and *Klebsiella pneumoniae* (ATCC 700603) were used in the experiments. For  
70 the preparation of overnight cultures of the test organisms, 20 mL LB medium was  
71 inoculated with a loopful of the bacterium and incubated at 37 °C in a rotary shaker at 200  
72 rpm. Briefly, 200 µL of the pathogen bacteria from an overnight culture was spread on a  
73 Mueller–Hinton agar (blood agar was used for *E. faecalis*) with a glass rod. Subsequently,  
74 three wells were made in each of these plates using a 5 mm diameter sterile transfer tube.  
75 Each well was filled with 60 µL of induced, non-induced mutant, or wild type of the bacterial  
76 supernatants. Kanamycin was used as a positive control at different concentrations (25,  
77 50, 100, 200, 400, and 800 µL/mg). Petri dishes (10 mm) were incubated at 37 °C for 48  
78 h. After the incubation period, the diameter of the inhibition zones (mm) was assessed by  
79 measuring the diameter in two perpendicular directions and taking the average [7]. Ten  
80 petri dishes were used for each replicate, and the experiments were conducted three  
81 times on different dates.

82

83

## Supplementary material:

**Table S1:** Overview of oligonucleotides used in this work for the amplification of the homologous regions of the promoter-exchange mutants.

| strain                              | locus tag(s) of analyzed gene(s) | oligonucleotide                    | sequence 5'–3'                                                                                                         |
|-------------------------------------|----------------------------------|------------------------------------|------------------------------------------------------------------------------------------------------------------------|
| <i>X. szentirmaii</i><br>pCEP_fcl   | Xsze_03745                       | SW159_XszC_fw<br>SW160_XszC_rv     | TTTGGGCTAACAGGAGGCTAGCATATGTCTGAGACATATTTTTTACATGATAGAAAAATTCGTGG<br>TCTGCAGAGCTCGAGCATGCACATGCAATATTCCCGCACGGGTATATGC |
| <i>X. budapestensis</i><br>pCEP_fcl | Xbud_02634                       | SW271_Xbud_fw<br>SW272_Xbud_rv     | TTTGGGCTAACAGGAGGCTAGCATATGTCCAAGACGTATTTTTTGCATG<br>TCTGCAGAGCTCGAGCATGCACATCTTCATTCCACTCAAGATACATTCCG                |
| <i>X. indica</i><br>pCEP_fcl        | Xind_02757                       | SW132_Xind_fw<br>SW133_Xind_rv     | TTTGGGCTAACAGGAGGCTAGCATATGTCCAAGACGTATTTTTTGCATG<br>TCTGCAGAGCTCGAGCATGCACATCGCTTTTACCTGCCCTTCC                       |
| <i>X. hominickii</i><br>pCEP_fcl    | Xhom_02793                       | SW130_Xhom_fw<br>SW131_XHom_rv     | TTTGGGCTAACAGGAGGCTAGCATATGTCTGAGTCATATCTTTTACATGATGG<br>TCTGCAGAGCTCGAGCATGCACATCTTCAACTAATTGAATATCGCTCGG             |
| <i>X. stockiae</i><br>pCEP_fcl      | Xsto_00102                       | SW273_uni_fw<br>SW276_Xsto_rv      | TTTGGGCTAACAGGAGGCTAGCATATGTCCAGGACATATTTTTTGCATG<br>TCTGCAGAGCTCGAGCATGCACATGCCAAGATCAAATAACTGGCG                     |
| <i>X. KJ12.1</i><br>pCEP_fcl        | Xekj_00388                       | SW153_KJ12.1_fw<br>SW154_KJ12.1_rv | TTTGGGCTAACAGGAGGCTAGCATATGTCCAGGACATATTTTTTGCATG<br>TCTGCAGAGCTCGAGCATGCACATCCATCACTGGAAGCTTCAACG                     |
| <i>X. KK7.4</i><br>pCEP_fcl         | ctg22_41                         | SW155_KK7.4_fw<br>SW156_KK7.4_rv   | TTTGGGCTAACAGGAGGCTAGCATTTTGCATGACAGAAAAATTAATGGAG<br>TCTGCAGAGCTCGAGCATGCACATGTGCAAAAATACTCTTTGCACGG                  |
| <i>P. temperata</i><br>pCEP_fcl     | MEG1DRAFT_01183                  | SW267_Ptemp_fw<br>SW268_Ptemp_rv   | TTTGGGCTAACAGGAGGCTAGCATATGTCTGAGACATATTTAATGCGTGG<br>TCTGCAGAGCTCGAGCATGCACATAAGTTGCTTTTCGACAGTGCC                    |

**Table S2:** Strains used in this work.

| strain                              | #                   | description                                   | origin    |
|-------------------------------------|---------------------|-----------------------------------------------|-----------|
| <i>X. szentirmaii</i>               | DSM 16338           | Wild type                                     | [8]       |
| <i>X. budapestensis</i>             | DSM 16342           | Wild type                                     | [8]       |
| <i>X. cabanillasii</i>              | JM26                | Wild type                                     | [9]       |
| <i>X. indica</i>                    | DSM 17382           | Wild type                                     | [10]      |
| <i>X. hominickii</i>                | DSM 17903           | Wild type                                     | [9]       |
| <i>X. stockiae</i>                  | DSM 17904           | Wild type                                     | [9]       |
| X. KJ12.1                           | KJ12.1              | Wild type                                     | [11]      |
| X. KK7.4                            | KK7.4               | Wild type                                     | [12]      |
| <i>X. innexi</i>                    | DSM 16336           | Wild type                                     | [8]       |
| <i>P. temperata</i>                 | meg1                | Wild type                                     | [13]      |
| <i>X. szentirmaii</i><br>pCEP_fcl   | DSM 16338           | Promoter exchange in front of Xsze_03745      | This work |
| <i>X. budapestensis</i><br>pCEP_fcl | DSM 16342           | Promoter exchange in front of Xbud_02634      | This work |
| <i>X. cabanillasii</i><br>pCEP_fcl  | JM26                | Promoter exchange in front of Xcab_02060      | [14]      |
| <i>X. indica</i><br>pCEP_fcl        | DSM 17382           | Promoter exchange in front of Xind_02757      | This work |
| <i>X. hominickii</i><br>pCEP_fcl    | DSM 17903           | Promoter exchange in front of Xhom_02793      | This work |
| <i>X. stockiae</i><br>pCEP_fcl      | DSM 17904           | Promoter exchange in front of Xsto_00102      | This work |
| X. KJ12.1<br>pCEP_fcl               | KJ12.1              | Promoter exchange in front of Xekj_00388      | This work |
| X. KK7.4<br>pCEP_fcl                | KK7.4               | Promoter exchange in front of ctg22_41        | This work |
| <i>P. temperata</i><br>pCEP_fcl     | meg1                | Promoter exchange in front of MEG1DRAFT_01183 | This work |
| <i>E. coli</i>                      | S17 $\lambda$ 1-pir | used for conjugation                          | [3]       |
| <i>E. coli</i>                      | ST18                | used for conjugation                          | [4]       |
| <i>E. coli</i>                      | ATCC25922           | Bioactivity analysis                          | ATCC      |
| <i>Enterococcus faecalis</i>        | ATCC29212           | Bioactivity analysis                          | ATCC      |
| <i>Staphylococcus aureus</i>        | ATCC29213           | Bioactivity analysis                          | ATCC      |
| <i>Klebsiella pneumoniae</i>        | ATCC700603          | Bioactivity analysis                          | ATCC      |

**Table S3:** Comparison of protein identities [%] from FcIA to FcIN in *X. budapestensis* DSM 16342 with *X. cabanillasii* JM26 (A) and *X. indica* DSM 17382 (B). Protein alignments were performed by ClustalW alignment with the CostMatrix BLOSUM in Geneious 6.1.8.

| Identity | FcIA | FcIB | FcIC | FcID | FcIE | FcIF | FcIG | FcIH | FcII | FcIJ | FcIK | FcIL | FcIM | FcIN |
|----------|------|------|------|------|------|------|------|------|------|------|------|------|------|------|
| A        | 96.5 | 92.2 | 95.6 | 94.8 | 97.2 | 96.1 | 96.1 | 97.4 | 93.6 | 96.4 | 93.6 | 92.8 | 98.7 | 97.8 |
| B        | 97.1 | 91.6 | 95.4 | 95.6 | 96.3 | 97.3 | 94.9 | 97.4 | 93.5 | 94.7 | 93.8 | 94.1 | 97.8 | 97   |

**Table S4:** Diameters of inhibition zones of different kanamycin concentrations against *Escherichia coli* (ATCC 25922), *Enterococcus faecalis* (ATCC 29212), *Staphylococcus aureus* (ATCC 29213) and *Klebsiella pneumoniae* (ATCC 700603).

|                      | kanamycin concentration [ $\mu\text{g/ml}$ ] |      |      |      |      |      |
|----------------------|----------------------------------------------|------|------|------|------|------|
|                      | 25                                           | 50   | 100  | 200  | 400  | 800  |
| <i>E. coli</i>       | 13.5                                         | 16.9 | 20.1 | 23.0 | 25.3 | 28.2 |
| <i>S. aureus</i>     | 0.0                                          | 0.0  | 13.3 | 18.5 | 21.6 | 24.7 |
| <i>E. faecalis</i>   | 0.0                                          | 0.0  | 11.9 | 16.5 | 19.3 | 24.1 |
| <i>K. pneumoniae</i> | 0.0                                          | 0.0  | 0.0  | 0.0  | 11.7 | 15.3 |

**Table S5:** Overview of the NCBI accession numbers of the strains used in this study.

| strain                                                     | accession number |
|------------------------------------------------------------|------------------|
| <i>Xenorhabdus szentirmaii</i> DSM 16338                   | NIBV00000000     |
| <i>Xenorhabdus budapestensis</i> DSM 16342                 | NIBS00000000     |
| <i>Xenorhabdus cabanillasii</i> JM26                       | NJGH00000000     |
| <i>Xenorhabdus indica</i> DSM 17382                        | NKHP00000000     |
| <i>Xenorhabdus hominickii</i> DSM 17903                    | NJAI00000000     |
| <i>Xenorhabdus stockiae</i> DSM17904                       | NJAJ00000000     |
| <i>Xenorhabdus</i> KJ12.1                                  | NJCW00000000     |
| <i>Xenorhabdus</i> KK7.4                                   | NJAH00000000     |
| <i>Xenorhabdus bovienii</i> SS-2004                        | FN667741         |
| <i>Xenorhabdus innexi</i> DSM 16336                        | NIBU00000000     |
| <i>Photorhabdus temperata</i> subsp. <i>temperata</i> Meg1 | NZ_JGVH00000000  |

**Table S6:** Stachelhaus-codes and corresponding amino acid prediction of the promiscuous A-domains A<sub>2</sub> and A<sub>6</sub> in the analyzed strains [15,16].

| strain                  | A-domain A <sub>2</sub> |            | A-domain A <sub>6</sub> |            |
|-------------------------|-------------------------|------------|-------------------------|------------|
|                         | Stachelhaus             | prediction | Stachelhaus             | prediction |
| <i>X. budapestensis</i> | DTWTLASVGK              | phe        | DAWFIGGTFK              | val        |
| <i>X. indica</i>        | DTWTLASVGK              | phe        | DAWFIGGTFK              | val        |
| <i>X. cabanillasii</i>  | DTWTLASVGK              | phe        | DAWFIGGTFK              | val        |
| <i>X. hominickii</i>    | DTWTIASVGK              | phe        | DALFIGGTFK              | val        |
| <i>X. szentirmaii</i>   | DVWTMSAVGK              | ser        | DALFIGGTFK              | val        |
| KJ12.1                  | DTWTIASVGK              | phe        | DAWFIGGTFK              | val        |
| <i>X. stockiae</i>      | DTWTIASVGK              | phe        | DAWFIGGTFK              | val        |
| KK7.4                   | DTWTIASVGK              | phe        | DAWFVGGTFK              | val        |
| <i>X. innexi</i>        | DTWTMASVGK              | phe        | DAWFVGGTFK              | val        |



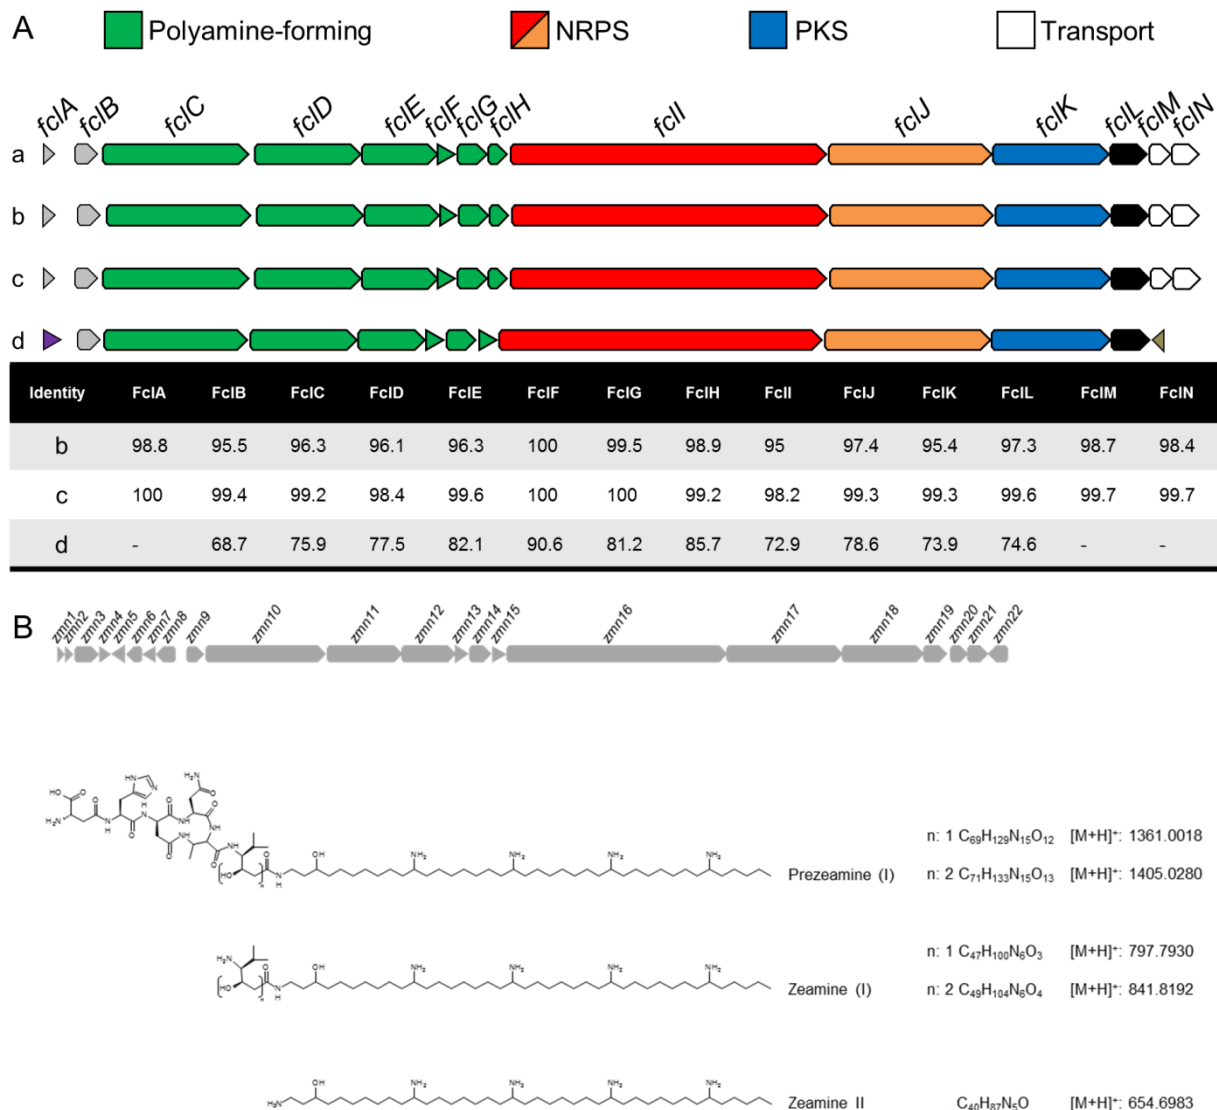

**Figure S1:** (A) Comparison of the *fcl* BGCs in *X. stockiae* DSM 17904 (a), KK7.4 (b), KJ12.1 (c) and the homologous gene cluster in *X. innexi* DSM 16336 (d). Shown are protein identities in comparison with *X. stockiae* [%]. Protein alignments were performed by ClustalW alignments with the CostMatrix BLOSUM in Geneious 6.1.8. The two aberrant genes of the *X. innexi* BGC are shown in purple (encoding a TonB homologue) and in brown (encoding an Acyl-CoA-thioesterase) [17]. (B) Zeamine biosynthesis gene cluster and corresponding compounds from *Serratia plymuthica* RVH1 [18,19].

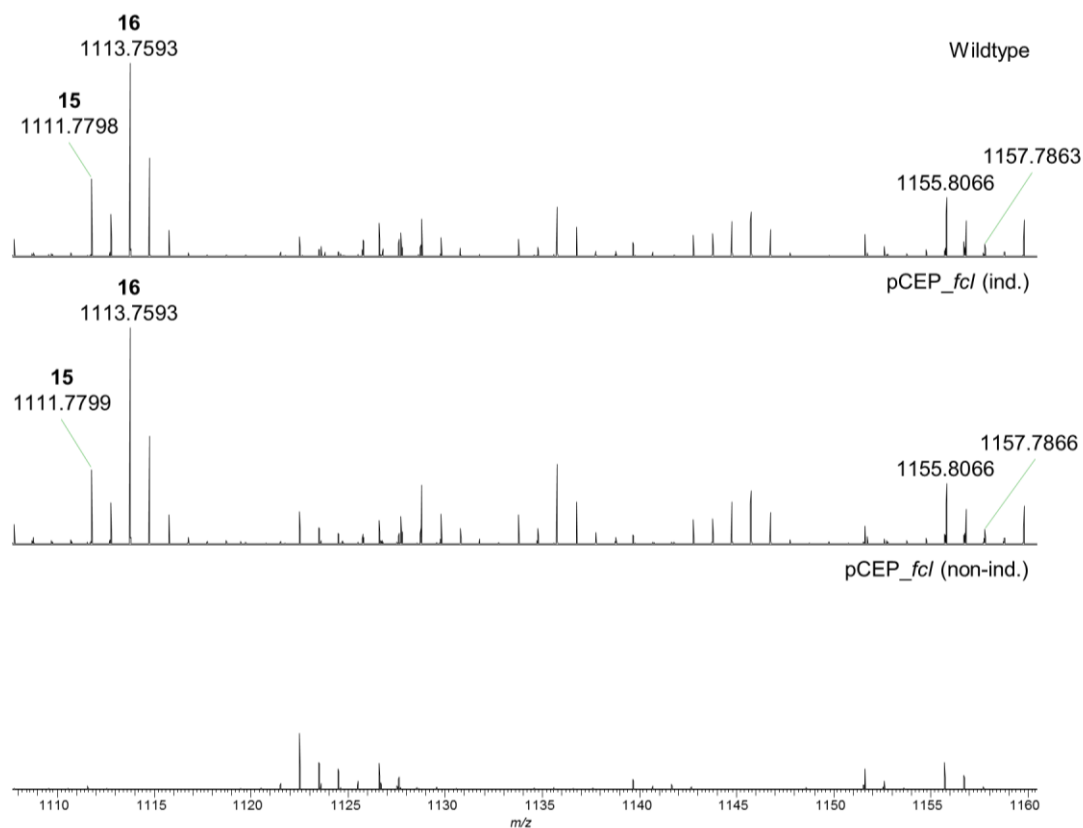

| #  | Sum formula                                                      | Calc. m/z | Det. m/z  |           | $\Delta$ ppm |          |
|----|------------------------------------------------------------------|-----------|-----------|-----------|--------------|----------|
|    |                                                                  |           | WT        | pCEP_fcl  | WT           | pCEP_fcl |
| 15 | C <sub>54</sub> H <sub>102</sub> N <sub>12</sub> O <sub>12</sub> | 1111.7813 | 1111.7798 | 1111.7799 | -1.370       | -1.244   |
| 16 | C <sub>53</sub> H <sub>100</sub> N <sub>12</sub> O <sub>13</sub> | 1113.7606 | 1113.7593 | 1113.7593 | -1.120       | -1.129   |
| -  | C <sub>56</sub> H <sub>106</sub> N <sub>12</sub> O <sub>13</sub> | 1155.8075 | 1155.8066 | 1155.8066 | -0.820       | -0.759   |
| -  | C <sub>55</sub> H <sub>104</sub> N <sub>12</sub> O <sub>14</sub> | 1157.7868 | 1157.7863 | 1157.7866 | -0.408       | -0.175   |

**Figure S2:** MALDI-HRMS spectra of *X. szentirmaii* wild type (WT) and pCEP\_fcl promoter-exchange mutant (induced and noninduced) with compounds **15** and **16** showing sum formulas, calculated and detected masses and corresponding  $\Delta$ ppm.

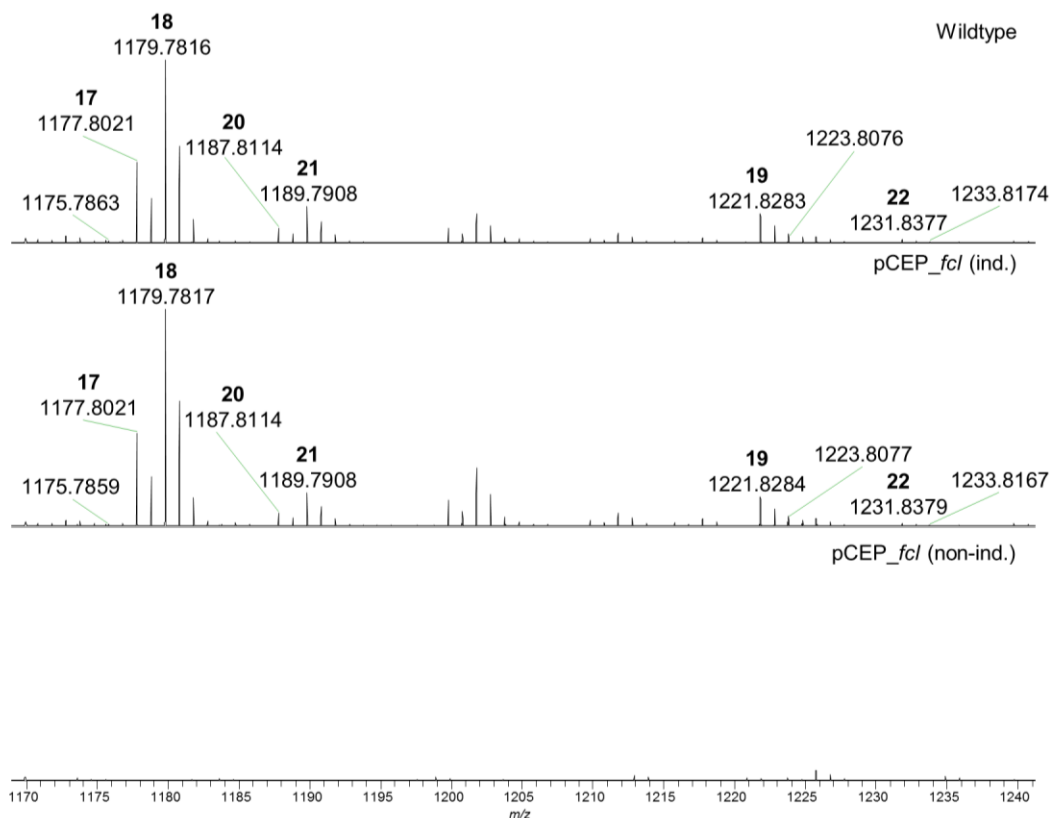

| #  | Sum formula                                                      | Calc. m/z | Det. m/z  |           | Δppm   |          |
|----|------------------------------------------------------------------|-----------|-----------|-----------|--------|----------|
|    |                                                                  |           | WT        | pCEP_fcl  | WT     | pCEP_fcl |
| -  | C <sub>57</sub> H <sub>102</sub> N <sub>14</sub> O <sub>12</sub> | 1175.7874 | 1175.7863 | 1175.7859 | -0.945 | -1.294   |
| 17 | C <sub>57</sub> H <sub>104</sub> N <sub>14</sub> O <sub>12</sub> | 1177.8031 | 1177.8021 | 1177.8021 | -0.850 | -0.816   |
| 18 | C <sub>56</sub> H <sub>102</sub> N <sub>14</sub> O <sub>13</sub> | 1179.7824 | 1179.7816 | 1179.7817 | -0.657 | -0.539   |
| 20 | C <sub>60</sub> H <sub>106</sub> N <sub>12</sub> O <sub>12</sub> | 1187.8126 | 1187.8114 | 1187.8114 | -1.013 | -1.004   |
| 21 | C <sub>59</sub> H <sub>104</sub> N <sub>12</sub> O <sub>13</sub> | 1189.7979 | 1189.7908 | 1189.7908 | -0.872 | -0.914   |
| 19 | C <sub>59</sub> H <sub>108</sub> N <sub>14</sub> O <sub>13</sub> | 1221.8293 | 1221.8283 | 1221.8284 | -0.839 | -0.782   |
| -  | C <sub>58</sub> H <sub>106</sub> N <sub>14</sub> O <sub>14</sub> | 1223.8086 | 1223.8076 | 1223.8077 | -0.760 | -0.736   |
| 22 | C <sub>62</sub> H <sub>110</sub> N <sub>12</sub> O <sub>13</sub> | 1231.8388 | 1231.8377 | 1231.8379 | -0.875 | -0.713   |
| -  | C <sub>61</sub> H <sub>108</sub> N <sub>12</sub> O <sub>14</sub> | 1233.8181 | 1233.8174 | 1233.8167 | -0.569 | -1.104   |

**Figure S3:** MALDI–HRMS spectra of *X. szentirmaii* wild type (WT) and pCEP\_fcl promoter-exchange mutant (induced and noninduced) with compounds 17–22 showing sum formulas, calculated and detected masses and corresponding Δppm. Compounds 17–22 were described previously [20].

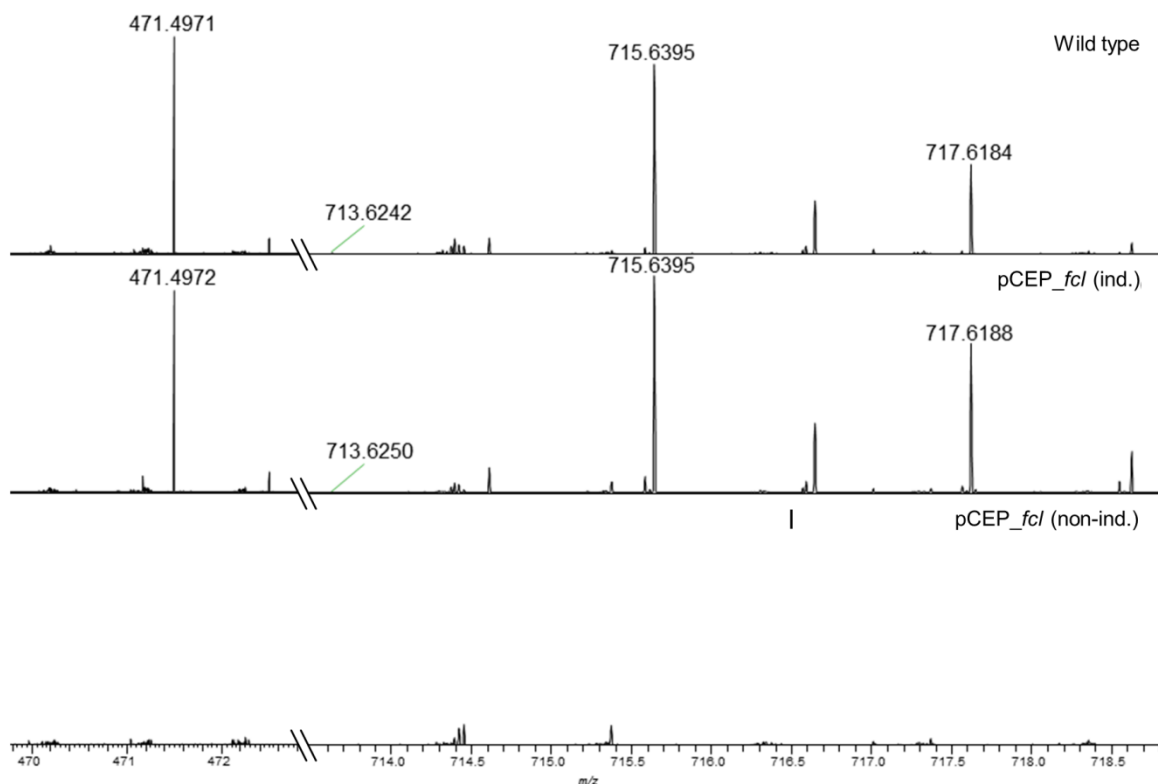

| Description         | Sum formula                                                   | Calc. m/z | Det. m/z |          | $\Delta$ ppm |          |
|---------------------|---------------------------------------------------------------|-----------|----------|----------|--------------|----------|
|                     |                                                               |           | WT       | pCEP_fcl | WT           | pCEP_fcl |
| Polyamine           | C <sub>28</sub> H <sub>62</sub> N <sub>4</sub> O              | 471.4996  | 471.4971 | 471.4972 | -5.470       | -5.237   |
| Shortened Fablavine | C <sub>39</sub> H <sub>80</sub> N <sub>6</sub> O <sub>5</sub> | 713.6263  | 713.6243 | 713.6250 | -2.867       | -1.858   |
| Shortened Fablavine | C <sub>39</sub> H <sub>82</sub> N <sub>6</sub> O <sub>5</sub> | 715.6419  | 715.6395 | 715.6395 | -3.362       | -3.474   |
| Shortened Fablavine | C <sub>38</sub> H <sub>80</sub> N <sub>6</sub> O <sub>6</sub> | 717.6212  | 717.6184 | 717.6188 | -3.861       | -3.345   |

**Figure S4:** MALDI–HRMS spectra of *X. szentirmaii* wild type (WT) and pCEP\_fcl promoter-exchange mutant (induced and noninduced) with polyamine and shortened fabclavines showing sum formulas, calculated and detected masses and corresponding  $\Delta$ ppm.

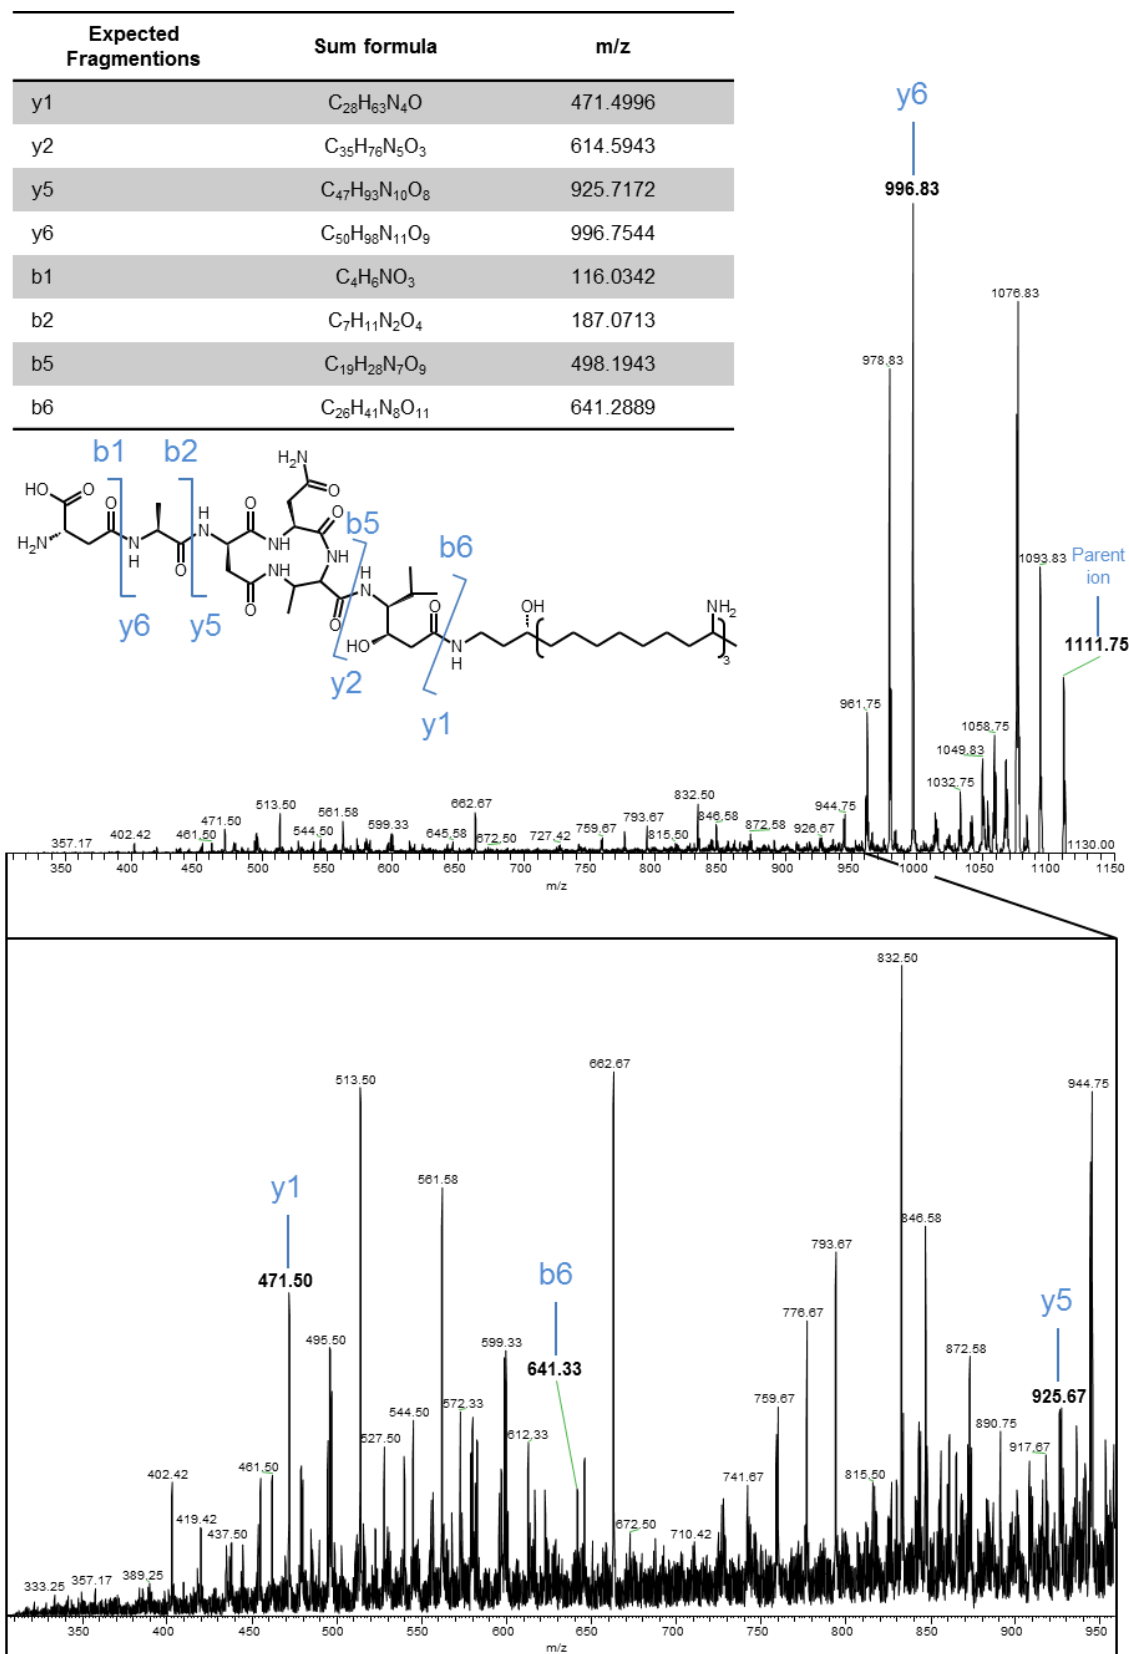

**Figure S5:** MALDI-MS<sup>2</sup> spectra of compound 1111.78 (15) of *X. szentirmaii* pCEP\_fcl (induced) showing expected fragment ions and proposed structure.

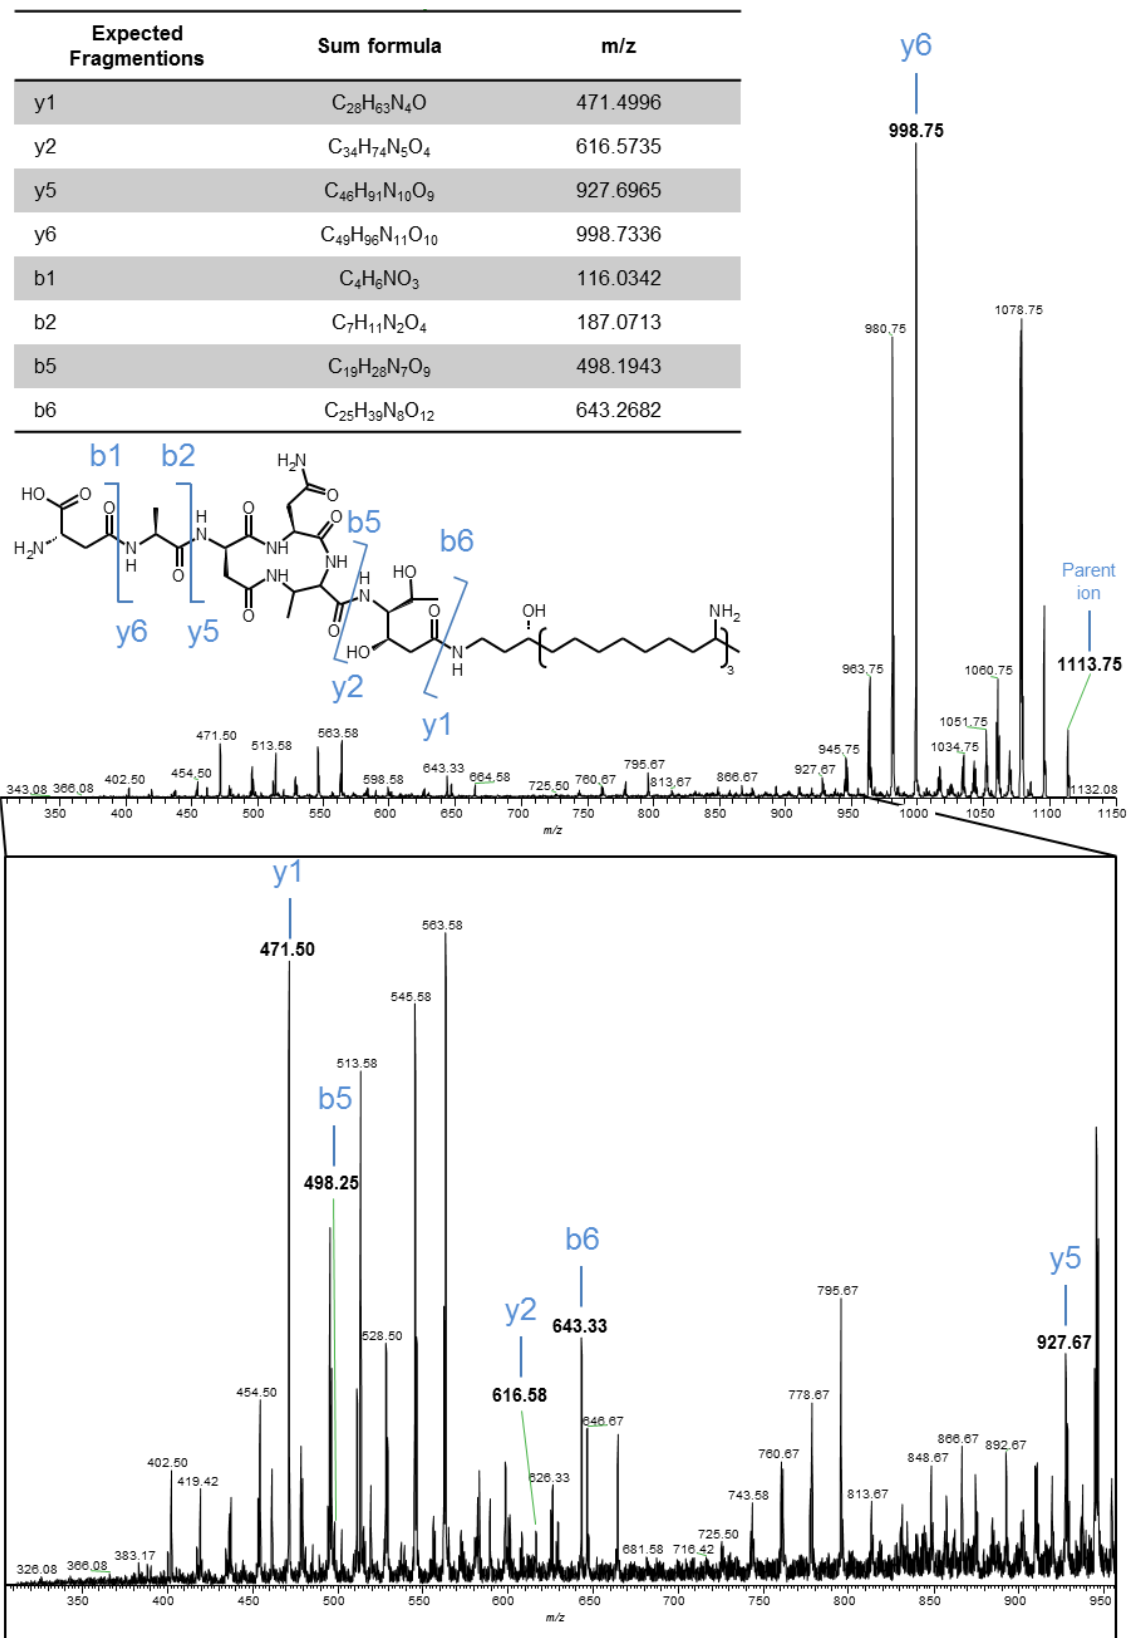

**Figure S6:** MALDI-MS<sup>2</sup> spectra of compound 1113.76 (**16**) of *X. szentirmaii* pCEP\_fcl (induced) showing expected fragment ions and proposed structure.

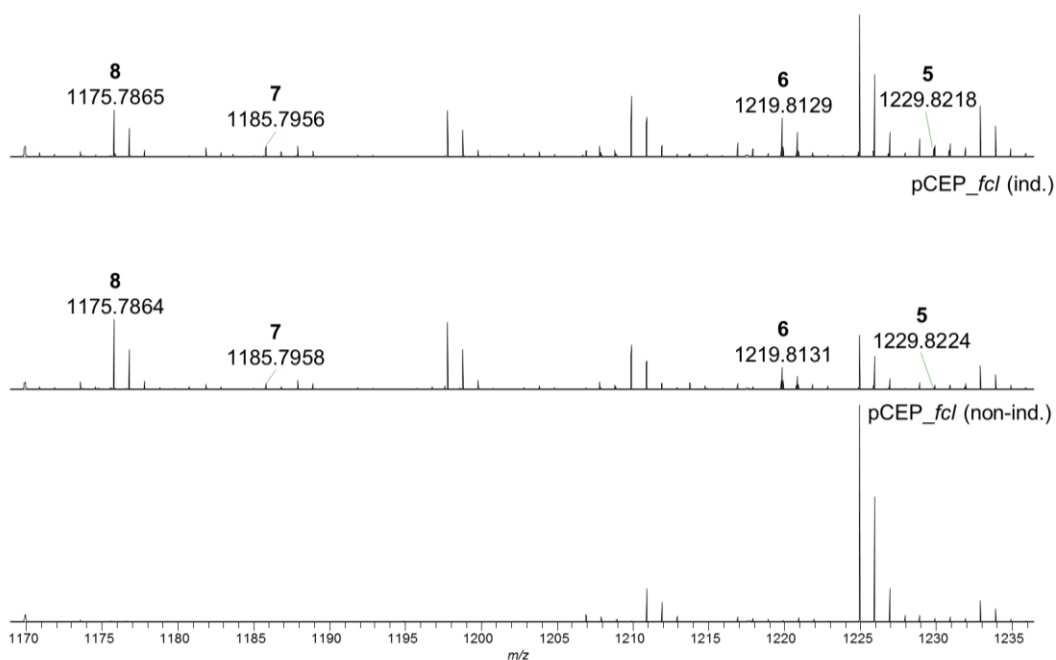

| # | Sum formula                                                      | Calc. m/z | Det. m/z  |           | $\Delta$ ppm |          |
|---|------------------------------------------------------------------|-----------|-----------|-----------|--------------|----------|
|   |                                                                  |           | WT        | pCEP_fcl  | WT           | pCEP_fcl |
| 8 | C <sub>57</sub> H <sub>102</sub> N <sub>14</sub> O <sub>12</sub> | 1175.7874 | 1175.7865 | 1175.7865 | -0.800       | -0.843   |
| 7 | C <sub>60</sub> H <sub>104</sub> N <sub>12</sub> O <sub>12</sub> | 1185.7969 | 1185.7956 | 1185.7958 | -1.107       | -0.981   |
| 6 | C <sub>59</sub> H <sub>106</sub> N <sub>14</sub> O <sub>13</sub> | 1219.8137 | 1219.8129 | 1219.8131 | -0.619       | -0.480   |
| 5 | C <sub>62</sub> H <sub>108</sub> N <sub>12</sub> O <sub>13</sub> | 1229.8232 | 1229.8218 | 1229.8224 | -1.088       | -0.608   |

**Figure S7:** MALDI-HRMS spectra of *X. budapestensis* wild type (WT) and pCEP\_fcl promoter-exchange mutant (induced and noninduced) with compounds 5–8 showing sum formulas, calculated and detected masses and corresponding  $\Delta$ ppm.

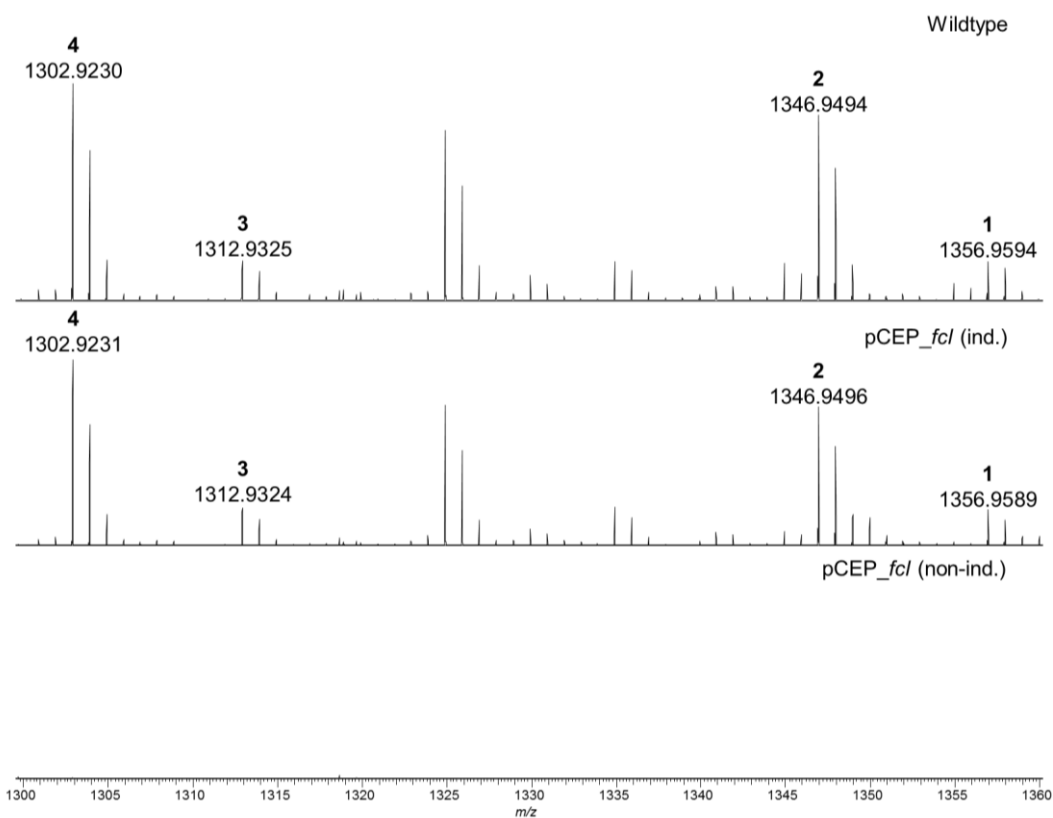

| # | Sum formula                                                      | Calc. m/z | Det. m/z  |           | $\Delta$ ppm |          |
|---|------------------------------------------------------------------|-----------|-----------|-----------|--------------|----------|
|   |                                                                  |           | WT        | pCEP_fcl  | WT           | pCEP_fcl |
| 4 | C <sub>65</sub> H <sub>119</sub> N <sub>15</sub> O <sub>12</sub> | 1302.9235 | 1302.9230 | 1302.9231 | -0.399       | -0.338   |
| 3 | C <sub>68</sub> H <sub>121</sub> N <sub>13</sub> O <sub>12</sub> | 1312.9330 | 1312.9325 | 1312.9324 | -0.451       | -0.459   |
| 2 | C <sub>67</sub> H <sub>123</sub> N <sub>15</sub> O <sub>13</sub> | 1346.9498 | 1346.9494 | 1346.9496 | -0.256       | -0.100   |
| 1 | C <sub>70</sub> H <sub>125</sub> N <sub>13</sub> O <sub>13</sub> | 1356.9593 | 1356.9594 | 1356.9589 | 0.098        | -0.248   |

**Figure S8:** MALDI-HRMS spectra of *X. budapestensis* wild type (WT) and pCEP\_fcl promoter-exchange mutant (induced and noninduced) with compounds 1–4 showing sum formulas, calculated and detected masses and corresponding  $\Delta$ ppm. Compounds 1–4 were described previously [20].



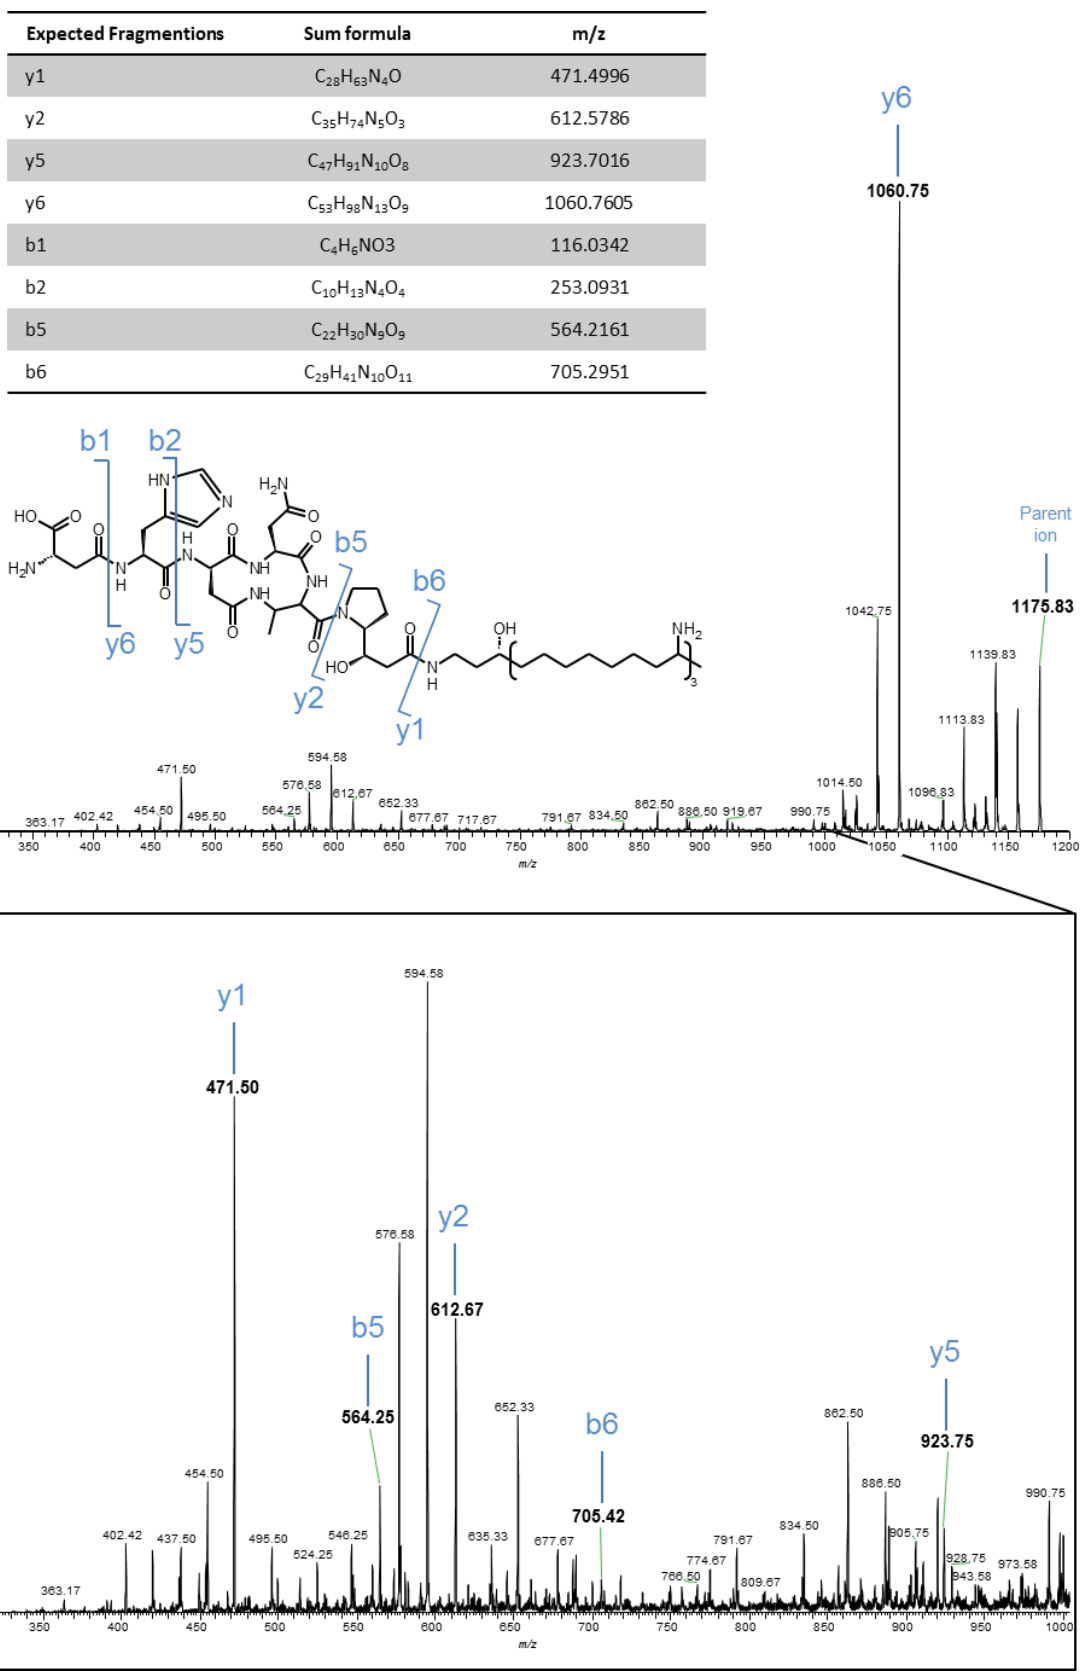

**Figure S9:** MALDI-MS<sup>2</sup> spectra of compound 1175.78 (**8**) of *X. budapestensis* pCEP\_fcl (induced) showing expected fragment ions and proposed structure.

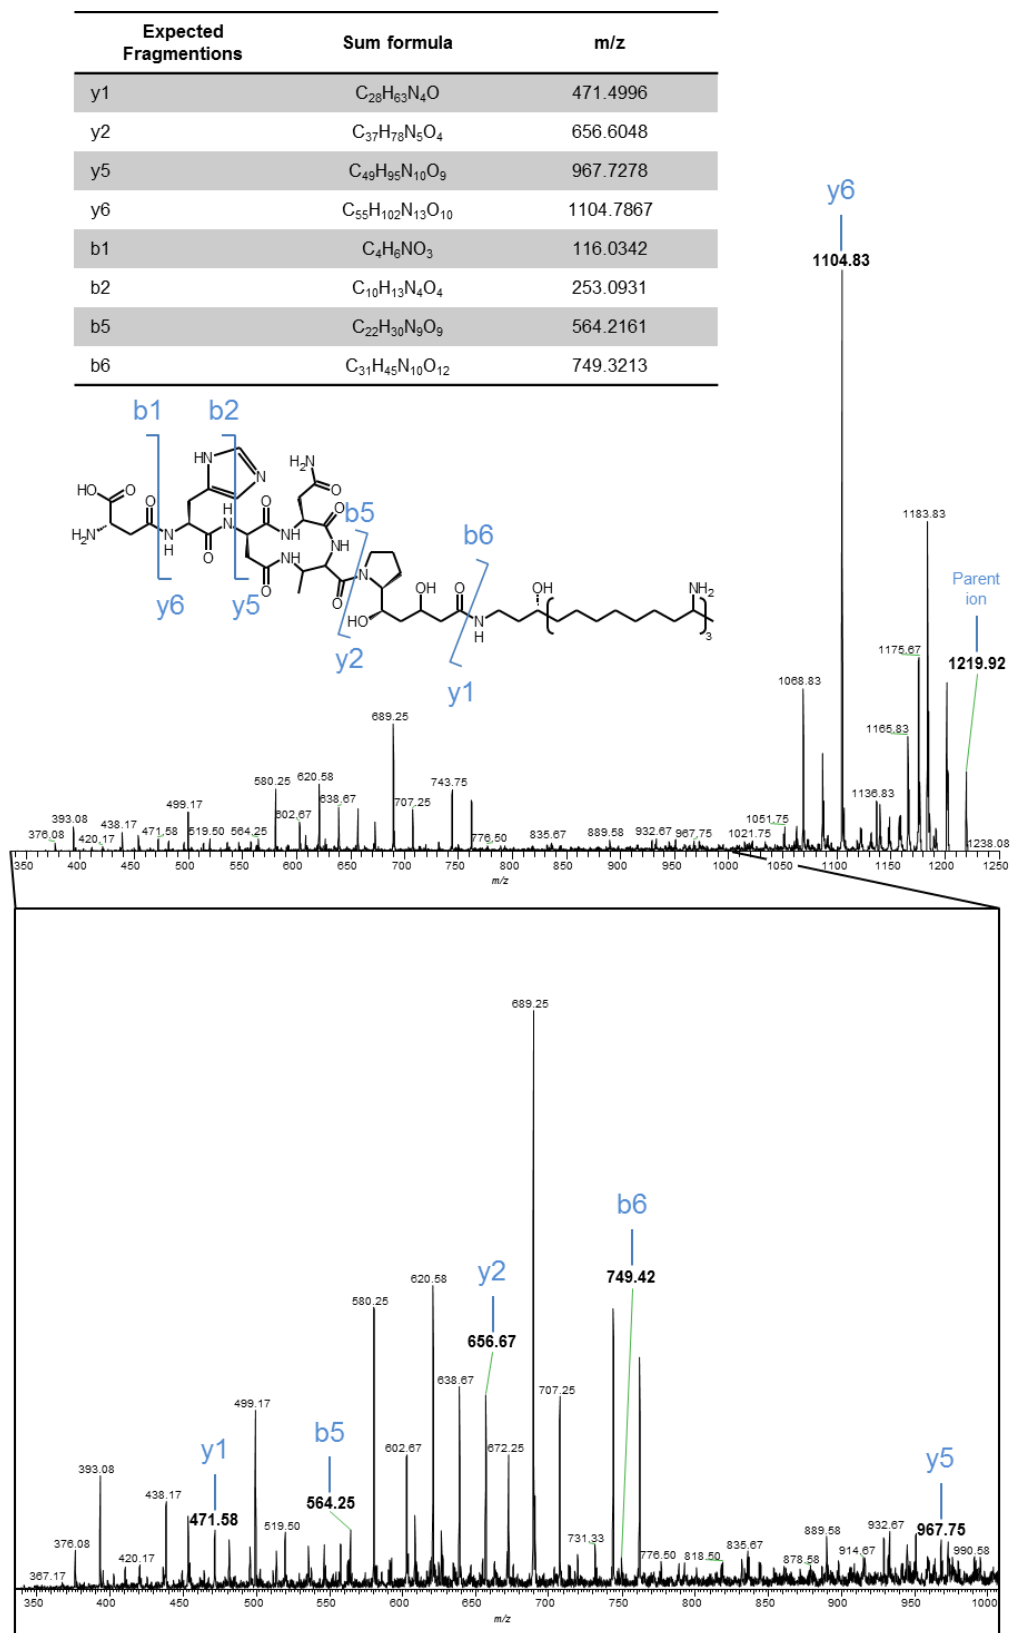

**Figure S10:** MALDI-MS<sup>2</sup> spectra of compound 1219.81 (6) of *X. budapestensis* pCEP\_fcl (induced) showing expected fragment ions and proposed structure.

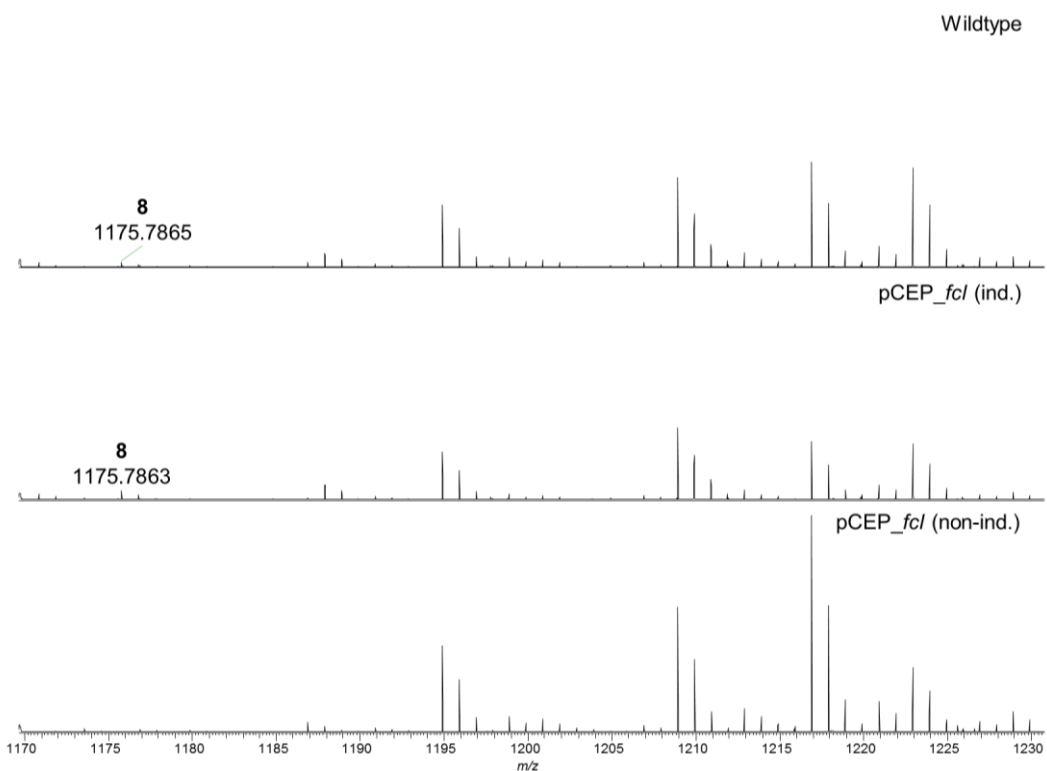

| # | Sum formula                                                      | Calc. m/z | Det. m/z  |           | Δppm   |          |
|---|------------------------------------------------------------------|-----------|-----------|-----------|--------|----------|
|   |                                                                  |           | WT        | pCEP_fcl  | WT     | pCEP_fcl |
| 8 | C <sub>57</sub> H <sub>102</sub> N <sub>14</sub> O <sub>12</sub> | 1175.7874 | 1175.7865 | 1175.7863 | -0.834 | -1.004   |
| 7 | C <sub>60</sub> H <sub>104</sub> N <sub>12</sub> O <sub>12</sub> | 1185.7969 | 1185.7952 | 1185.7947 | -1.495 | -1.892   |
| 6 | C <sub>59</sub> H <sub>106</sub> N <sub>14</sub> O <sub>13</sub> | 1219.8137 | 1219.8132 | 1219.8129 | -0.398 | -0.652   |
| 5 | C <sub>62</sub> H <sub>108</sub> N <sub>12</sub> O <sub>13</sub> | 1229.8232 | 1229.8221 | 1229.8229 | -0.860 | -0.234   |

**Figure S11:** MALDI–HRMS spectra of *X. indica* wild type (WT) and pCEP\_fcl promoter-exchange mutant (induced and noninduced) with compounds **5–8** showing sum formulas, calculated and detected masses and corresponding Δppm. Due to unspecific signals in all three spectra with high intensities the compounds **5–7** are not visible, but could be confirmed by HRMS.

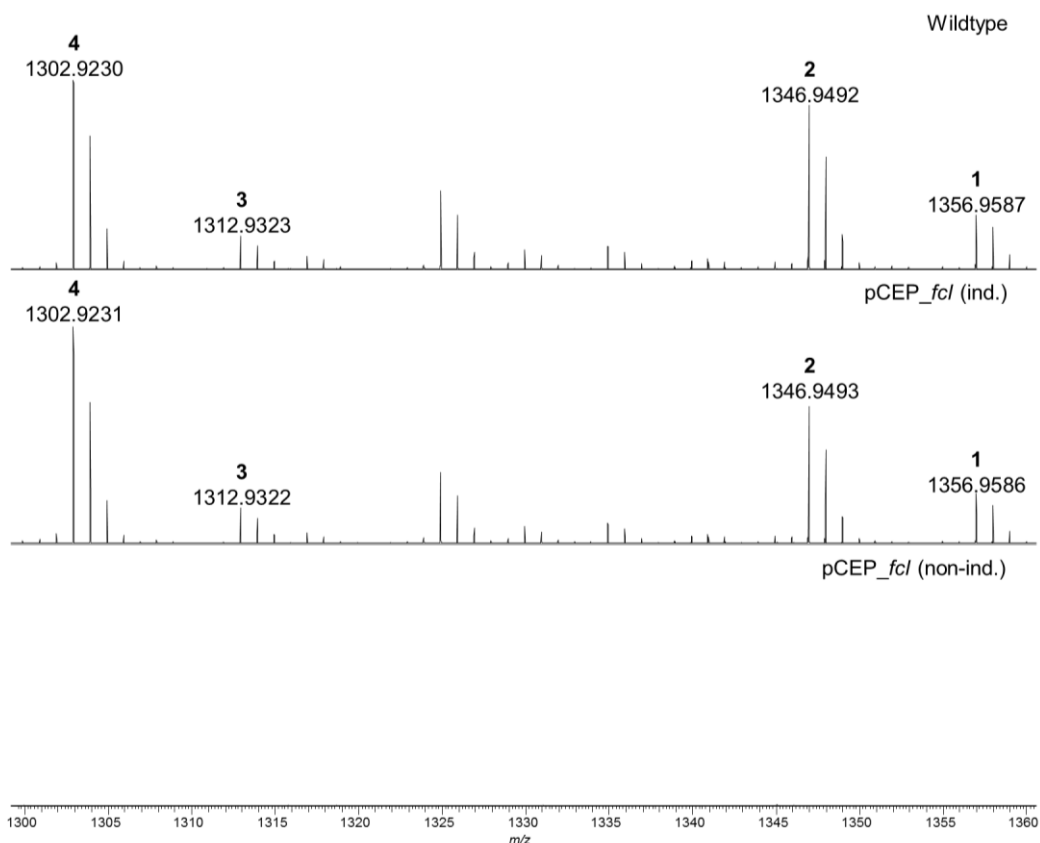

| # | Sum formula                                                      | Calc. m/z | Det. m/z  |           | Δppm   |          |
|---|------------------------------------------------------------------|-----------|-----------|-----------|--------|----------|
|   |                                                                  |           | WT        | pCEP_fcl  | WT     | pCEP_fcl |
| 4 | C <sub>65</sub> H <sub>119</sub> N <sub>15</sub> O <sub>12</sub> | 1302.9235 | 1302.9230 | 1302.9231 | -0.453 | -0.361   |
| 3 | C <sub>68</sub> H <sub>121</sub> N <sub>13</sub> O <sub>12</sub> | 1312.9330 | 1312.9323 | 1312.9322 | -0.558 | -0.626   |
| 2 | C <sub>67</sub> H <sub>123</sub> N <sub>15</sub> O <sub>13</sub> | 1346.9498 | 1346.9492 | 1346.9493 | -0.397 | -0.323   |
| 1 | C <sub>70</sub> H <sub>125</sub> N <sub>13</sub> O <sub>13</sub> | 1356.9593 | 1356.9587 | 1356.9586 | -0.447 | -0.492   |

**Figure S12:** MALDI-HRMS spectra of *X. indica* wild type (WT) and pCEP\_fcl promoter-exchange mutant (induced and noninduced) with compounds **1–4** showing sum formulas, calculated and detected masses and corresponding Δppm.

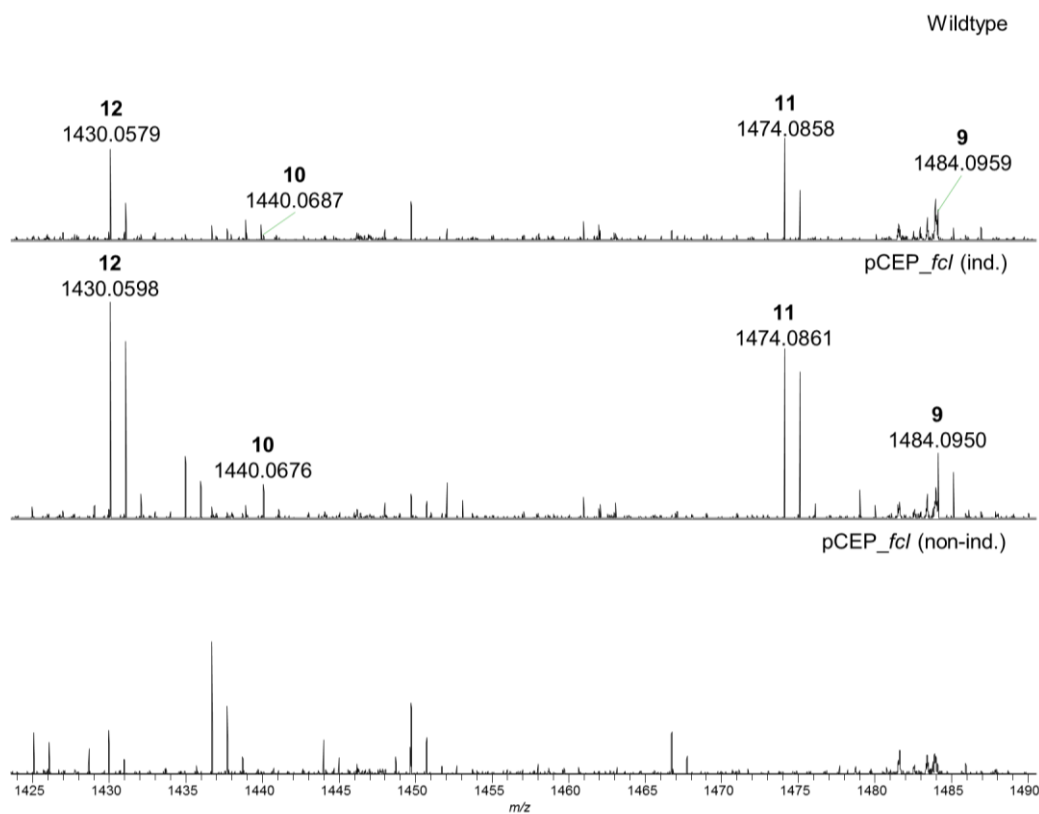

| #  | Sum formula                                                      | Calc. m/z | Det. m/z  |           | $\Delta$ ppm |          |
|----|------------------------------------------------------------------|-----------|-----------|-----------|--------------|----------|
|    |                                                                  |           | WT        | pCEP_fcl  | WT           | pCEP_fcl |
| 12 | C <sub>73</sub> H <sub>136</sub> N <sub>16</sub> O <sub>12</sub> | 1430.0596 | 1430.0579 | 1430.0598 | -1.238       | 0.084    |
| 10 | C <sub>76</sub> H <sub>138</sub> N <sub>14</sub> O <sub>12</sub> | 1440.0691 | 1440.0687 | 1440.0676 | -0.286       | -1.043   |
| 11 | C <sub>75</sub> H <sub>140</sub> N <sub>16</sub> O <sub>13</sub> | 1474.0859 | 1474.0858 | 1474.0861 | -0.030       | 0.180    |
| 9  | C <sub>78</sub> H <sub>142</sub> N <sub>14</sub> O <sub>13</sub> | 1484.0954 | 1484.0959 | 1484.0951 | 0.359        | -0.207   |

**Figure S13:** MALDI–HRMS spectra of *X. indica* wild type (WT) and pCEP\_fcl promoter-exchange mutant (induced and noninduced) with compounds **9–12** showing sum formulas, calculated and detected masses and corresponding  $\Delta$ ppm.

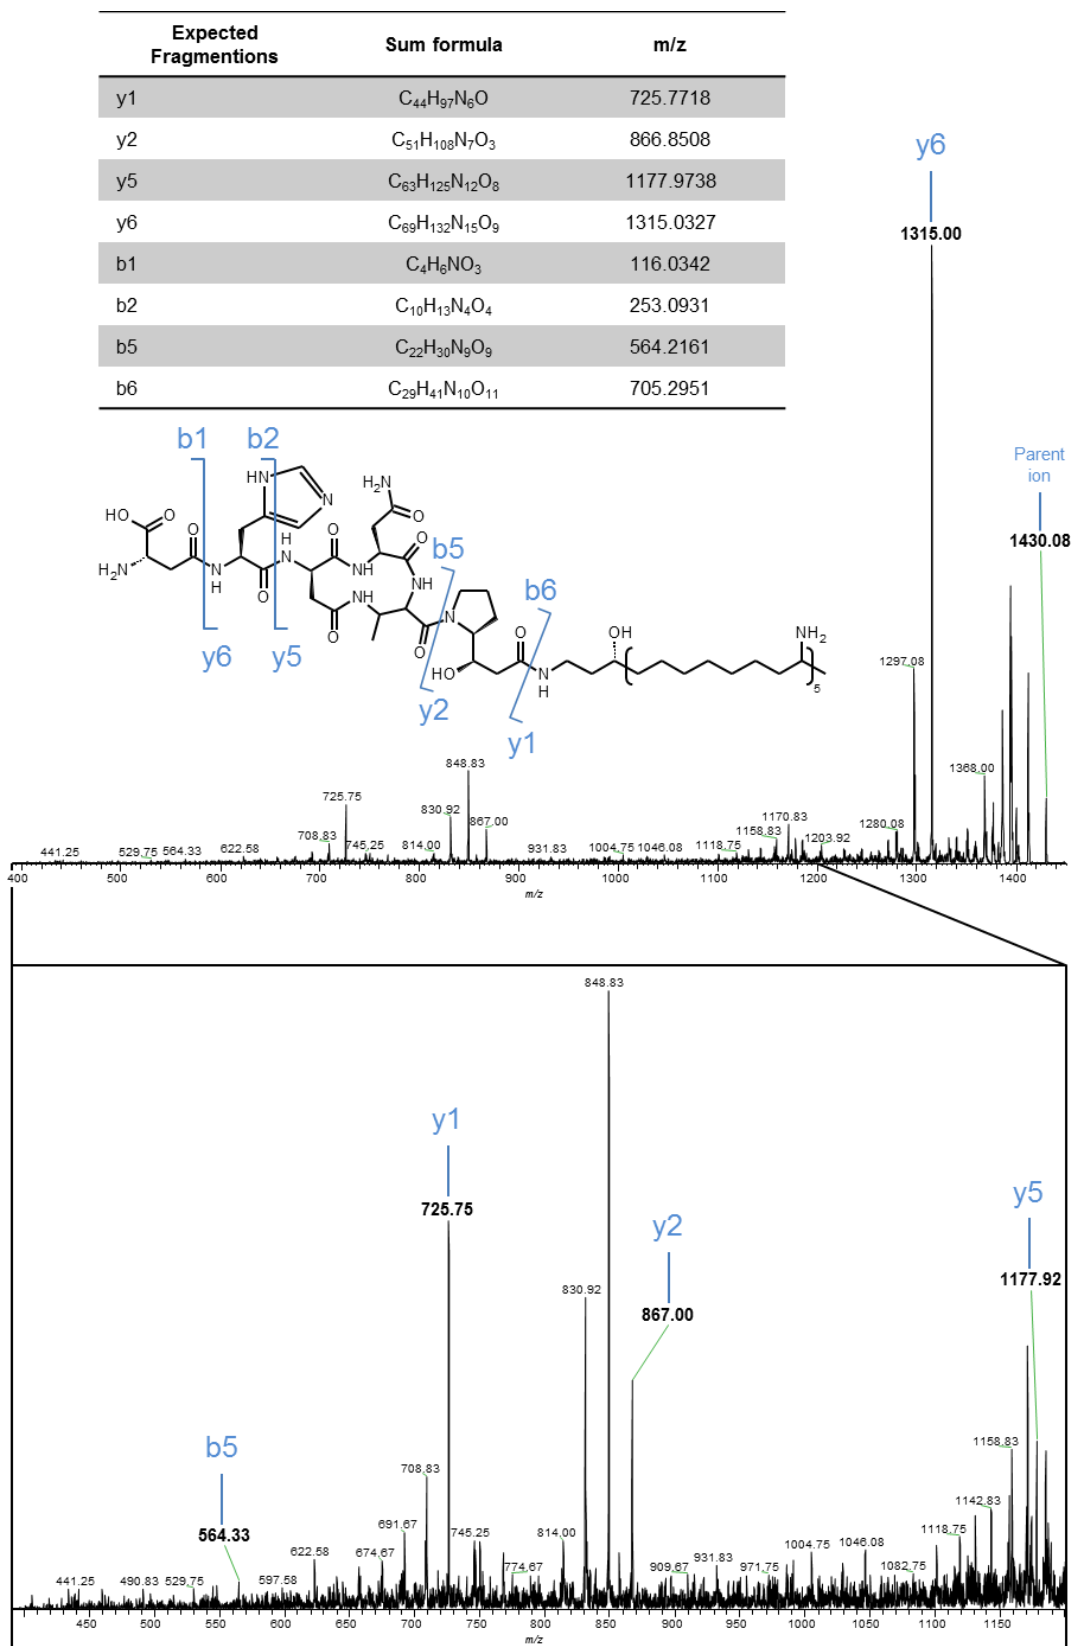

**Figure S14:** MALDI-MS<sup>2</sup> spectra of compound 1430.05 (12) of *X. indica* pCEP\_fcl (induced) showing expected fragment ions and proposed structure.

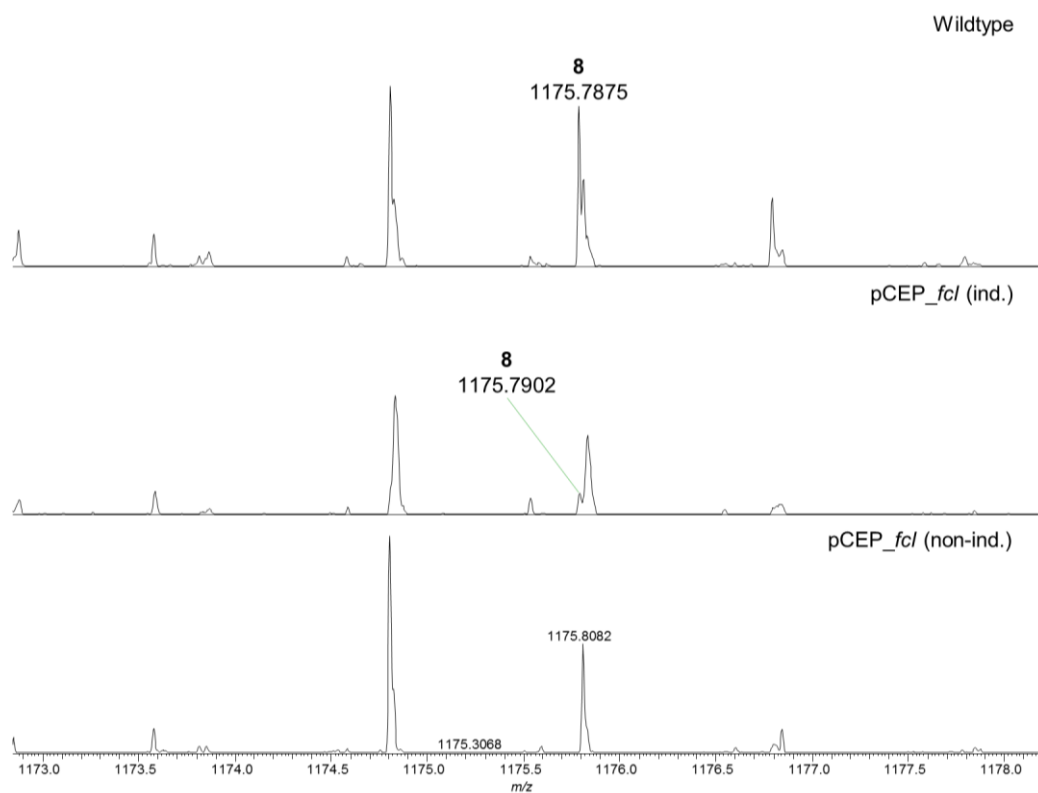

| # | Sum formula                                                      | Calc. m/z | Det. m/z  |           | Δppm  |          |
|---|------------------------------------------------------------------|-----------|-----------|-----------|-------|----------|
|   |                                                                  |           | WT        | pCEP_fcl  | WT    | pCEP_fcl |
| 8 | C <sub>57</sub> H <sub>102</sub> N <sub>14</sub> O <sub>12</sub> | 1175.7874 | 1175.7875 | 1175.7902 | 0.050 | 2.355    |

**Figure S15:** MALDI-HRMS spectra of *X. cabanillasii* wild type (WT) and pCEP\_fcl promoter-exchange mutant (induced and noninduced) with compound **8** showing sum formula, calculated and detected masses and corresponding Δppm.

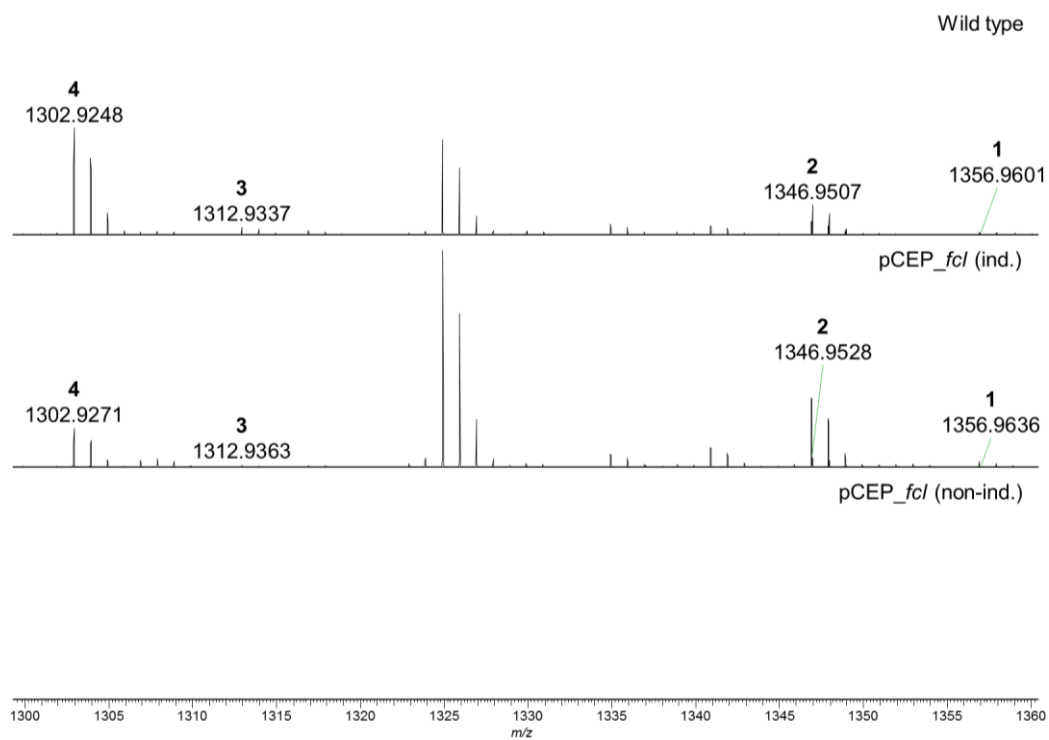

| # | Sum formula                                                      | Calc. m/z | Det. m/z  |           | $\Delta$ ppm |          |
|---|------------------------------------------------------------------|-----------|-----------|-----------|--------------|----------|
|   |                                                                  |           | WT        | pCEP_fcl  | WT           | pCEP_fcl |
| 4 | C <sub>65</sub> H <sub>119</sub> N <sub>15</sub> O <sub>12</sub> | 1302.9235 | 1302.9248 | 1302.9271 | 0.990        | 2.747    |
| 3 | C <sub>68</sub> H <sub>121</sub> N <sub>13</sub> O <sub>12</sub> | 1312.9330 | 1312.9337 | 1312.9363 | 0.516        | 2.481    |
| 2 | C <sub>67</sub> H <sub>123</sub> N <sub>15</sub> O <sub>13</sub> | 1346.9498 | 1346.9507 | 1346.9528 | 0.679        | 2.275    |
| 1 | C <sub>70</sub> H <sub>125</sub> N <sub>13</sub> O <sub>13</sub> | 1356.9593 | 1356.9601 | 1356.9636 | 0.636        | 3.193    |

**Figure S16:** MALDI-HRMS spectra of *X. cabanillasii* wild type (WT) and pCEP\_fcl promoter-exchange mutant (induced and noninduced) with compounds 1–4 showing sum formulas, calculated and detected masses and corresponding  $\Delta$ ppm. Compounds 1–4 were described previously [14].



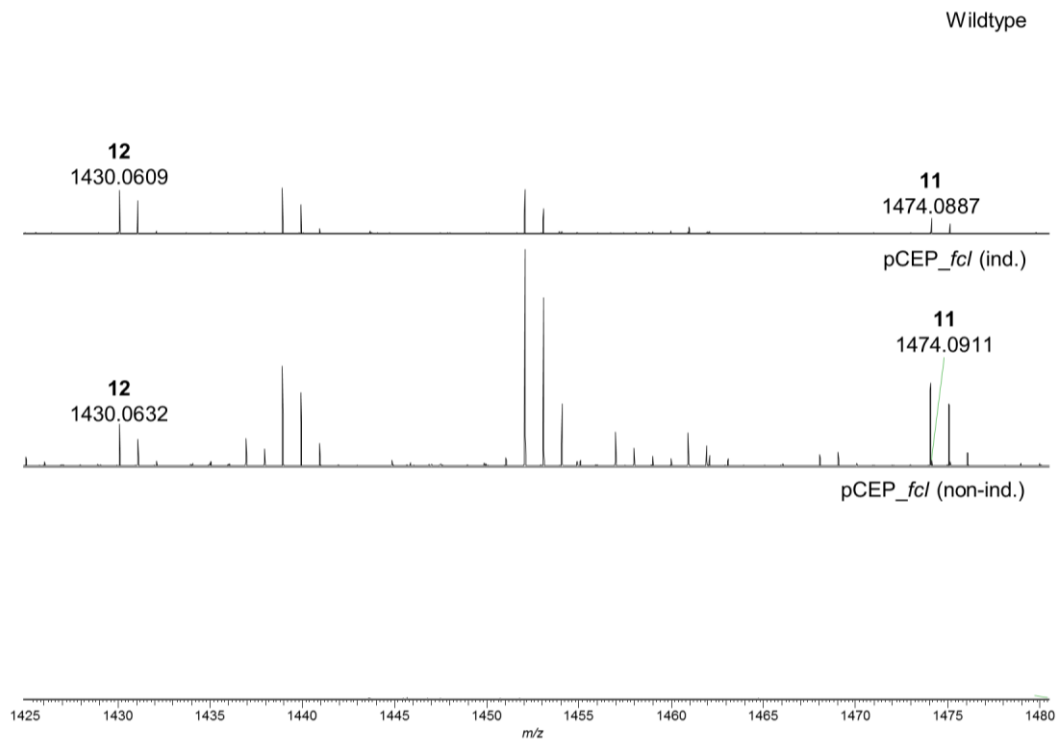

| #  | Sum formula                                                      | Calc. m/z | Det. m/z  |           | Δppm  |          |
|----|------------------------------------------------------------------|-----------|-----------|-----------|-------|----------|
|    |                                                                  |           | WT        | pCEP_fcl  | WT    | pCEP_fcl |
| 12 | C <sub>73</sub> H <sub>136</sub> N <sub>16</sub> O <sub>12</sub> | 1430.0596 | 1430.0609 | 1430.0633 | 0.860 | 2.524    |
| 11 | C <sub>75</sub> H <sub>140</sub> N <sub>16</sub> O <sub>13</sub> | 1474.0859 | 1474.0887 | 1474.0911 | 1.930 | 3.586    |

**Figure S17:** MALDI–HRMS spectra of *X. cabanillasii* wild type (WT) and pCEP\_fcl promoter-exchange mutant (induced and noninduced) with compounds **11** and **12** showing sum formulas, calculated and detected masses and corresponding Δppm.

Wildtype

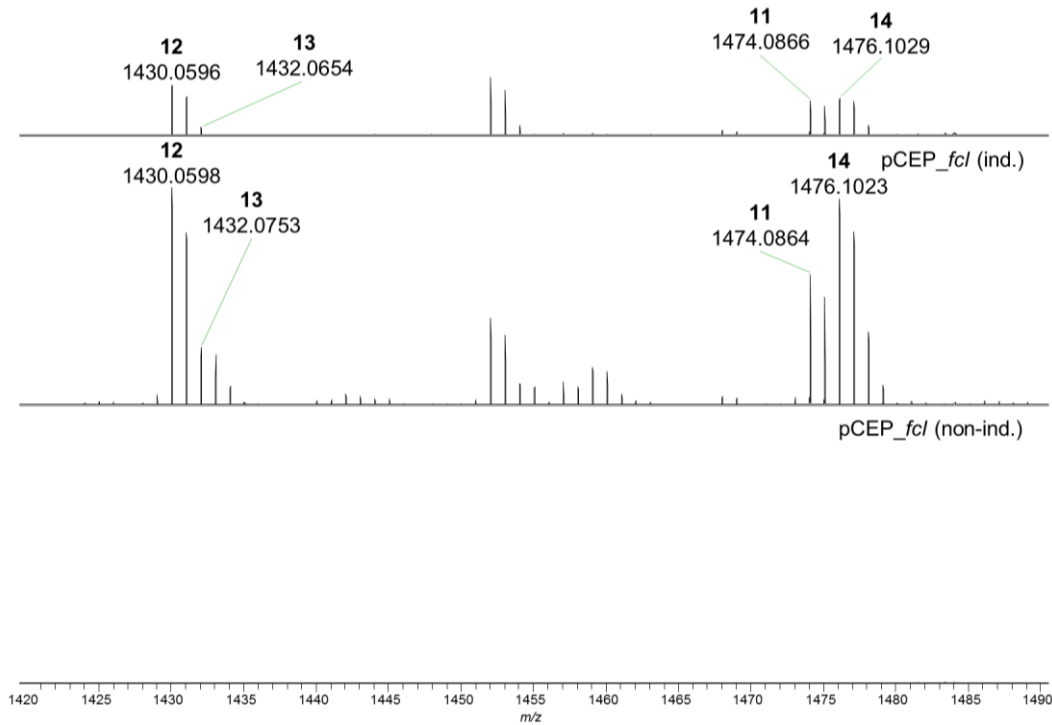

| #  | Sum formula                                                      | Calc. m/z | Det. m/z  |           | $\Delta$ ppm |          |
|----|------------------------------------------------------------------|-----------|-----------|-----------|--------------|----------|
|    |                                                                  |           | WT        | pCEP_fcl  | WT           | pCEP_fcl |
| 12 | C <sub>73</sub> H <sub>136</sub> N <sub>16</sub> O <sub>12</sub> | 1430.0596 | 1430.0596 | 1430.0599 | 0.000        | 0.147    |
| 13 | C <sub>73</sub> H <sub>138</sub> N <sub>16</sub> O <sub>12</sub> | 1432.0753 | 1432.0654 | 1432.0753 | -6.913       | 0.021    |
| 11 | C <sub>75</sub> H <sub>140</sub> N <sub>16</sub> O <sub>13</sub> | 1474.0859 | 1474.0866 | 1474.0864 | 0.485        | 0.370    |
| 14 | C <sub>75</sub> H <sub>142</sub> N <sub>16</sub> O <sub>13</sub> | 1476.1015 | 1476.1029 | 1476.1023 | 0.972        | 0.532    |

**Figure S18:** MALDI-HRMS spectra of *X. hominickii* wild type (WT) and pCEP\_fcl promoter-exchange mutant (induced and noninduced) with compounds **11–14** showing sum formulas, calculated and detected masses and corresponding  $\Delta$ ppm.

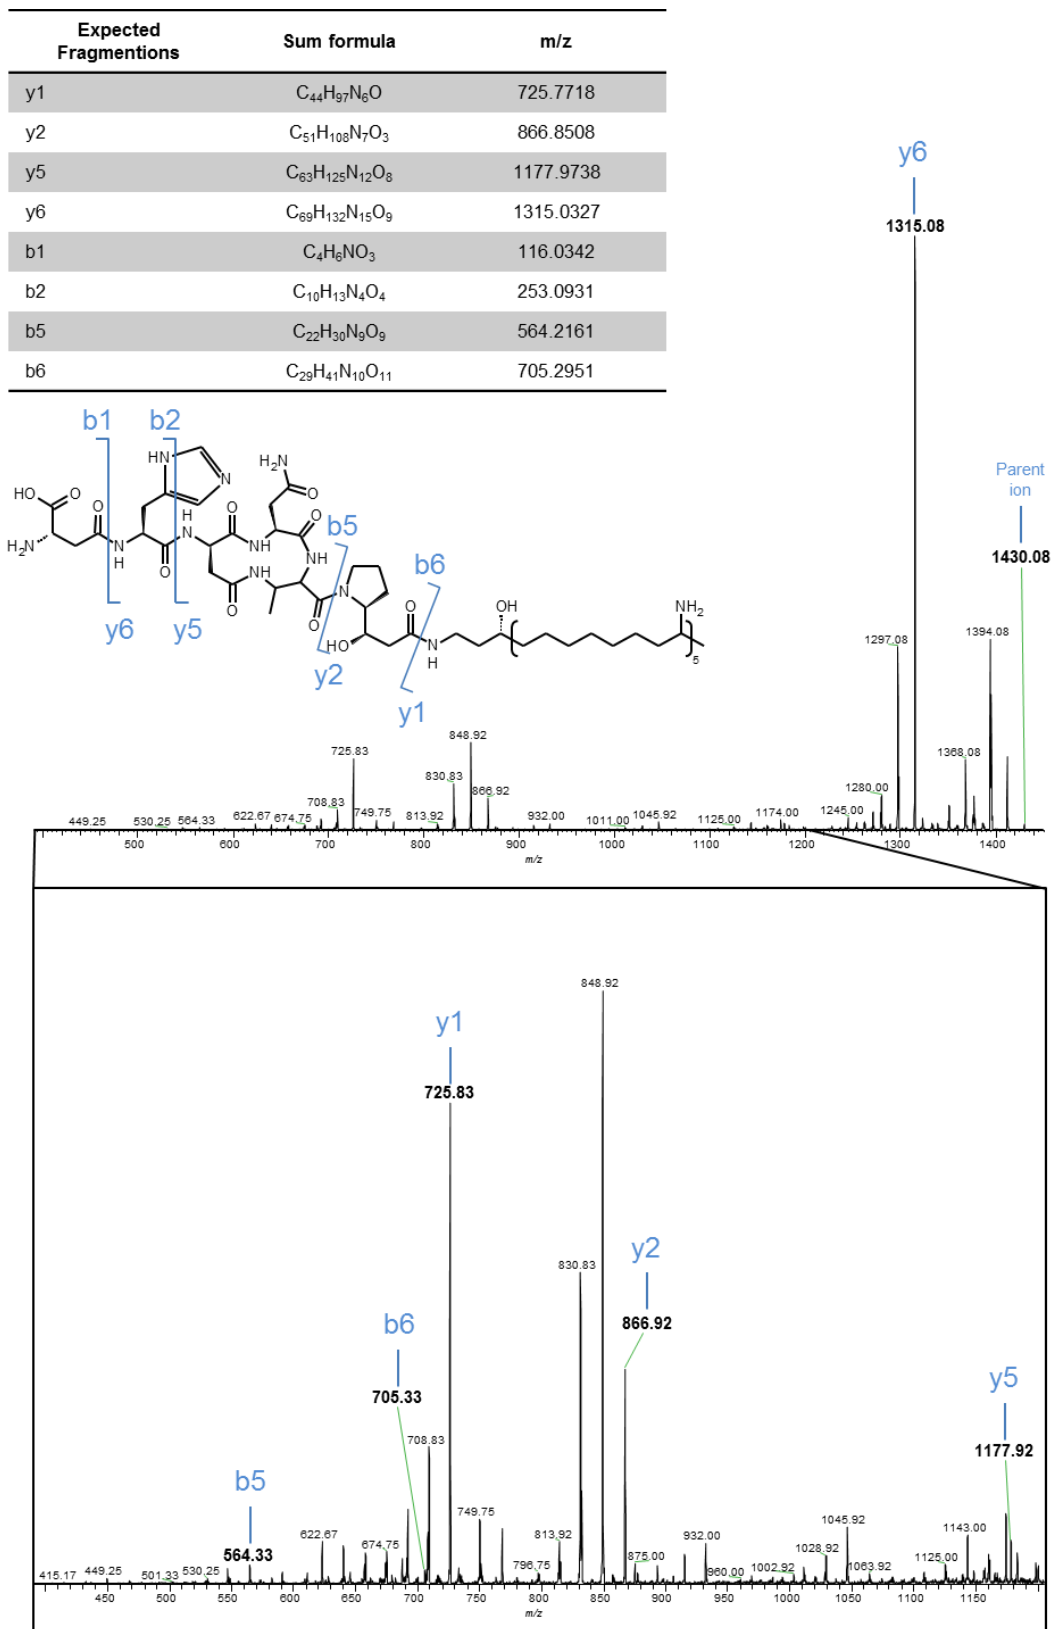

**Figure S19:** MALDI-MS<sup>2</sup> spectra of compound 1430.05 (12) of *X. hominickii* pCEP\_fcl (induced) showing expected fragment ions and proposed structure.

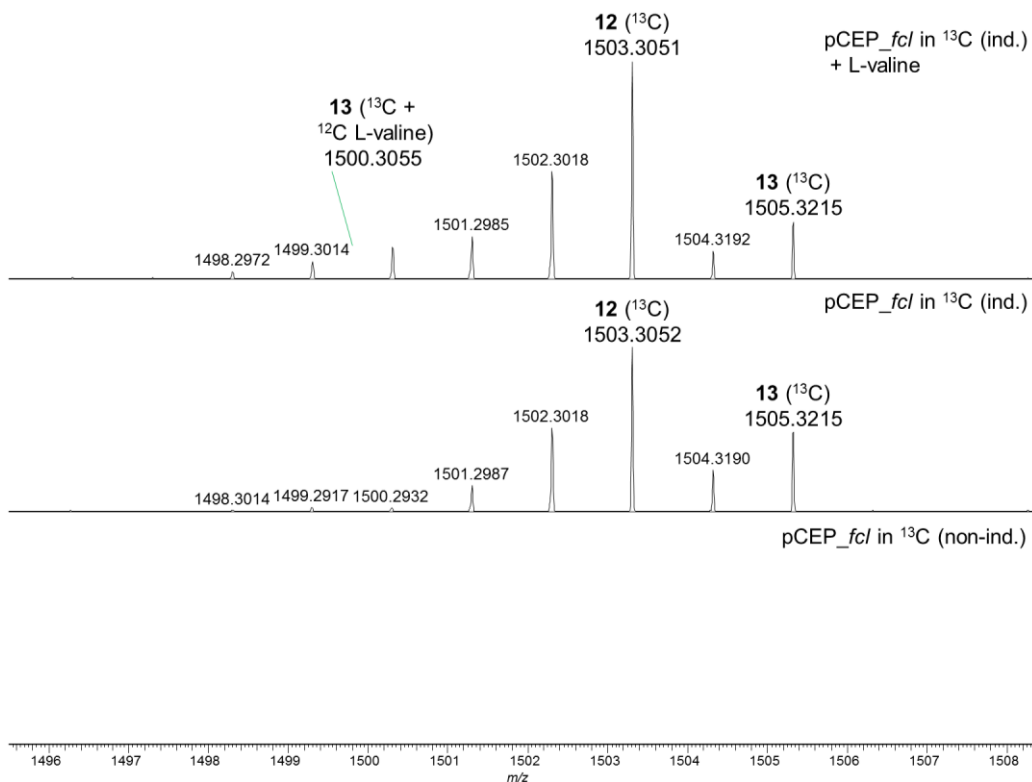

| #                                                       | Sum formula                                                                                   | Calc. m/z | Det. m/z  |                     | Δppm     |                     |
|---------------------------------------------------------|-----------------------------------------------------------------------------------------------|-----------|-----------|---------------------|----------|---------------------|
|                                                         |                                                                                               |           | pCEP_fcl  | pCEP_fcl + L-valine | pCEP_fcl | pCEP_fcl + L-valine |
| <b>12</b> ( <sup>13</sup> C)                            | <sup>13</sup> C <sub>73</sub> H <sub>136</sub> N <sub>16</sub> O <sub>12</sub>                | 1503.3048 | 1503.3052 | 1503.3051           | 0.2727   | 0.2262              |
| <b>13</b> ( <sup>13</sup> C)                            | <sup>13</sup> C <sub>73</sub> H <sub>138</sub> N <sub>16</sub> O <sub>12</sub>                | 1505.3204 | 1505.3215 | 1505.3215           | 0.6842   | 0.7241              |
| <b>13</b> ( <sup>13</sup> C + <sup>12</sup> C L-valine) | <sup>13</sup> C <sub>68</sub> C <sub>5</sub> H <sub>138</sub> N <sub>16</sub> O <sub>12</sub> | 1500.3037 | -         | 1500.3055           | -        | 1.2131              |

**Figure S20:** MALDI-HRMS spectra of the reverse feeding experiment in <sup>13</sup>C medium of *X. hominickii* pCEP\_fcl mutant (induced and noninduced) with compounds **12** and **13** (with and without feeding of <sup>12</sup>C L-valine) showing sum formulas, calculated and detected masses and corresponding Δppm.

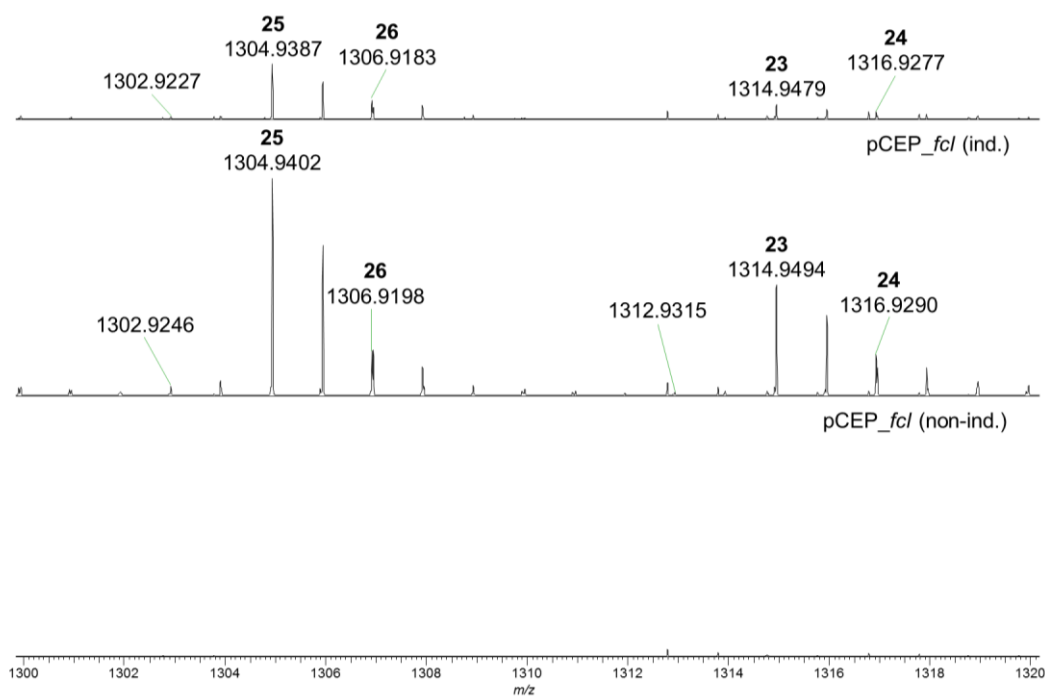

| #         | Sum formula                                                      | Calc. m/z | Det. m/z  |           | $\Delta$ ppm |          |
|-----------|------------------------------------------------------------------|-----------|-----------|-----------|--------------|----------|
|           |                                                                  |           | WT        | pCEP_fcl  | WT           | pCEP_fcl |
| -         | C <sub>65</sub> H <sub>119</sub> N <sub>15</sub> O <sub>12</sub> | 1302.9235 | 1302.9227 | 1302.9246 | -0.630       | 0.813    |
| <b>25</b> | C <sub>65</sub> H <sub>121</sub> N <sub>15</sub> O <sub>12</sub> | 1304.9392 | 1304.9387 | 1304.9402 | -0.384       | 0.774    |
| <b>26</b> | C <sub>64</sub> H <sub>119</sub> N <sub>15</sub> O <sub>13</sub> | 1306.9185 | 1306.9183 | 1306.9198 | -0.149       | 1.029    |
| -         | C <sub>68</sub> H <sub>121</sub> N <sub>13</sub> O <sub>12</sub> | 1312.9330 | 1312.9290 | 1312.9315 | -3.064       | -1.167   |
| <b>23</b> | C <sub>68</sub> H <sub>123</sub> N <sub>13</sub> O <sub>12</sub> | 1314.9487 | 1314.9479 | 1314.9494 | -0.595       | 0.568    |
| <b>24</b> | C <sub>67</sub> H <sub>121</sub> N <sub>13</sub> O <sub>13</sub> | 1316.9280 | 1316.9277 | 1316.9290 | -0.218       | 0.769    |

**Figure S21:** MALDI-HRMS spectra of KJ12.1 wild type (WT) and pCEP\_fcl promoter-exchange mutant (induced and noninduced) with compounds **23–26** showing sum formulas, calculated and detected masses and corresponding  $\Delta$ ppm.

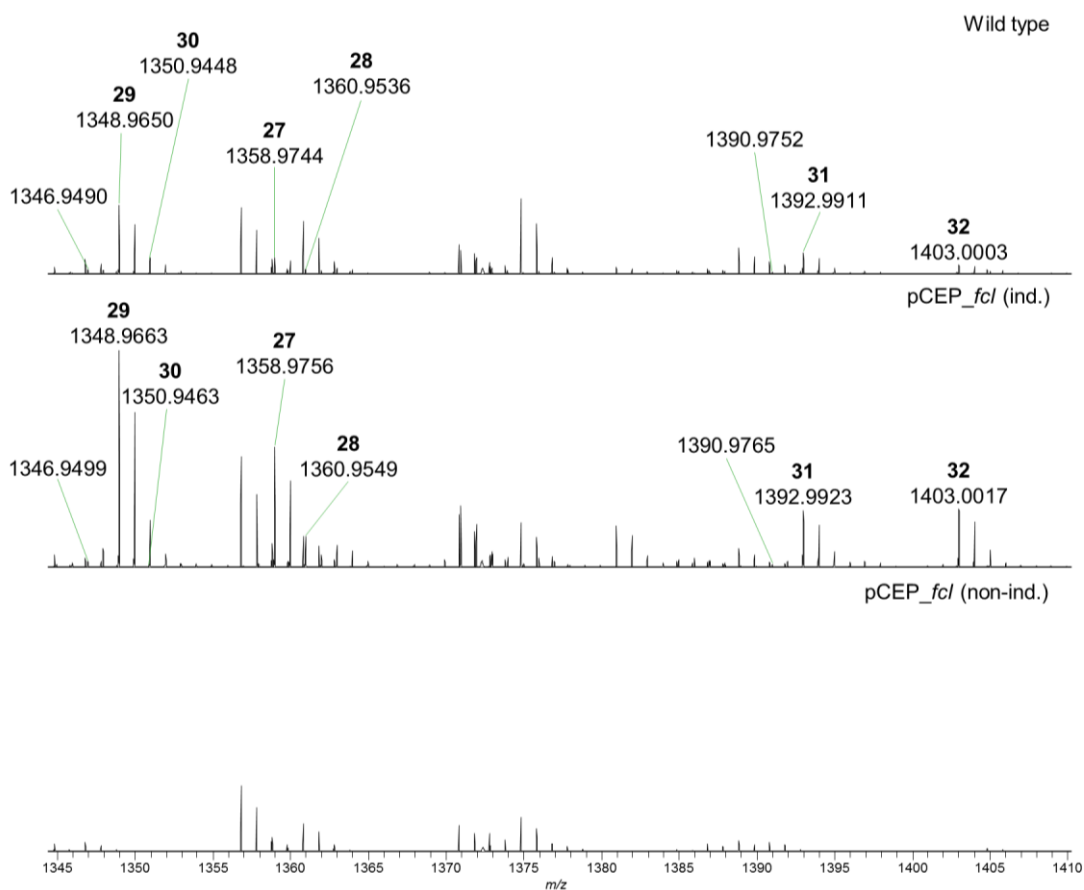

| #  | Sum formula                                                      | Calc. m/z | Det. m/z  |           | $\Delta$ ppm |          |
|----|------------------------------------------------------------------|-----------|-----------|-----------|--------------|----------|
|    |                                                                  |           | WT        | pCEP_fcl  | WT           | pCEP_fcl |
| -  | C <sub>67</sub> H <sub>123</sub> N <sub>15</sub> O <sub>13</sub> | 1346.9498 | 1346.9490 | 1346.9499 | -0.575       | 0.115    |
| 29 | C <sub>67</sub> H <sub>125</sub> N <sub>15</sub> O <sub>13</sub> | 1348.9654 | 1348.9650 | 1348.9663 | -0.323       | 0.626    |
| 30 | C <sub>66</sub> H <sub>123</sub> N <sub>15</sub> O <sub>14</sub> | 1350.9447 | 1350.9448 | 1350.9463 | 0.096        | 1.222    |
| 27 | C <sub>70</sub> H <sub>127</sub> N <sub>13</sub> O <sub>13</sub> | 1358.9749 | 1358.9744 | 1358.9756 | -0.403       | 0.480    |
| 28 | C <sub>69</sub> H <sub>125</sub> N <sub>13</sub> O <sub>14</sub> | 1360.9542 | 1360.9536 | 1360.9549 | -0.442       | 0.542    |
| -  | C <sub>69</sub> H <sub>127</sub> N <sub>15</sub> O <sub>14</sub> | 1390.9760 | 1390.9752 | 1390.9765 | -0.546       | 0.403    |
| 31 | C <sub>69</sub> H <sub>129</sub> N <sub>15</sub> O <sub>14</sub> | 1392.9916 | 1392.9911 | 1392.9923 | -0.366       | 0.467    |
| 32 | C <sub>72</sub> H <sub>131</sub> N <sub>13</sub> O <sub>14</sub> | 1403.0011 | 1403.0003 | 1403.0017 | -0.593       | 0.398    |

**Figure S22:** MALDI-HRMS spectra of KJ12.1 wild type (WT) and pCEP\_fcl promoter-exchange mutant (induced and noninduced) with compounds **27–32** showing sum formulas, calculated and detected masses and corresponding  $\Delta$ ppm.

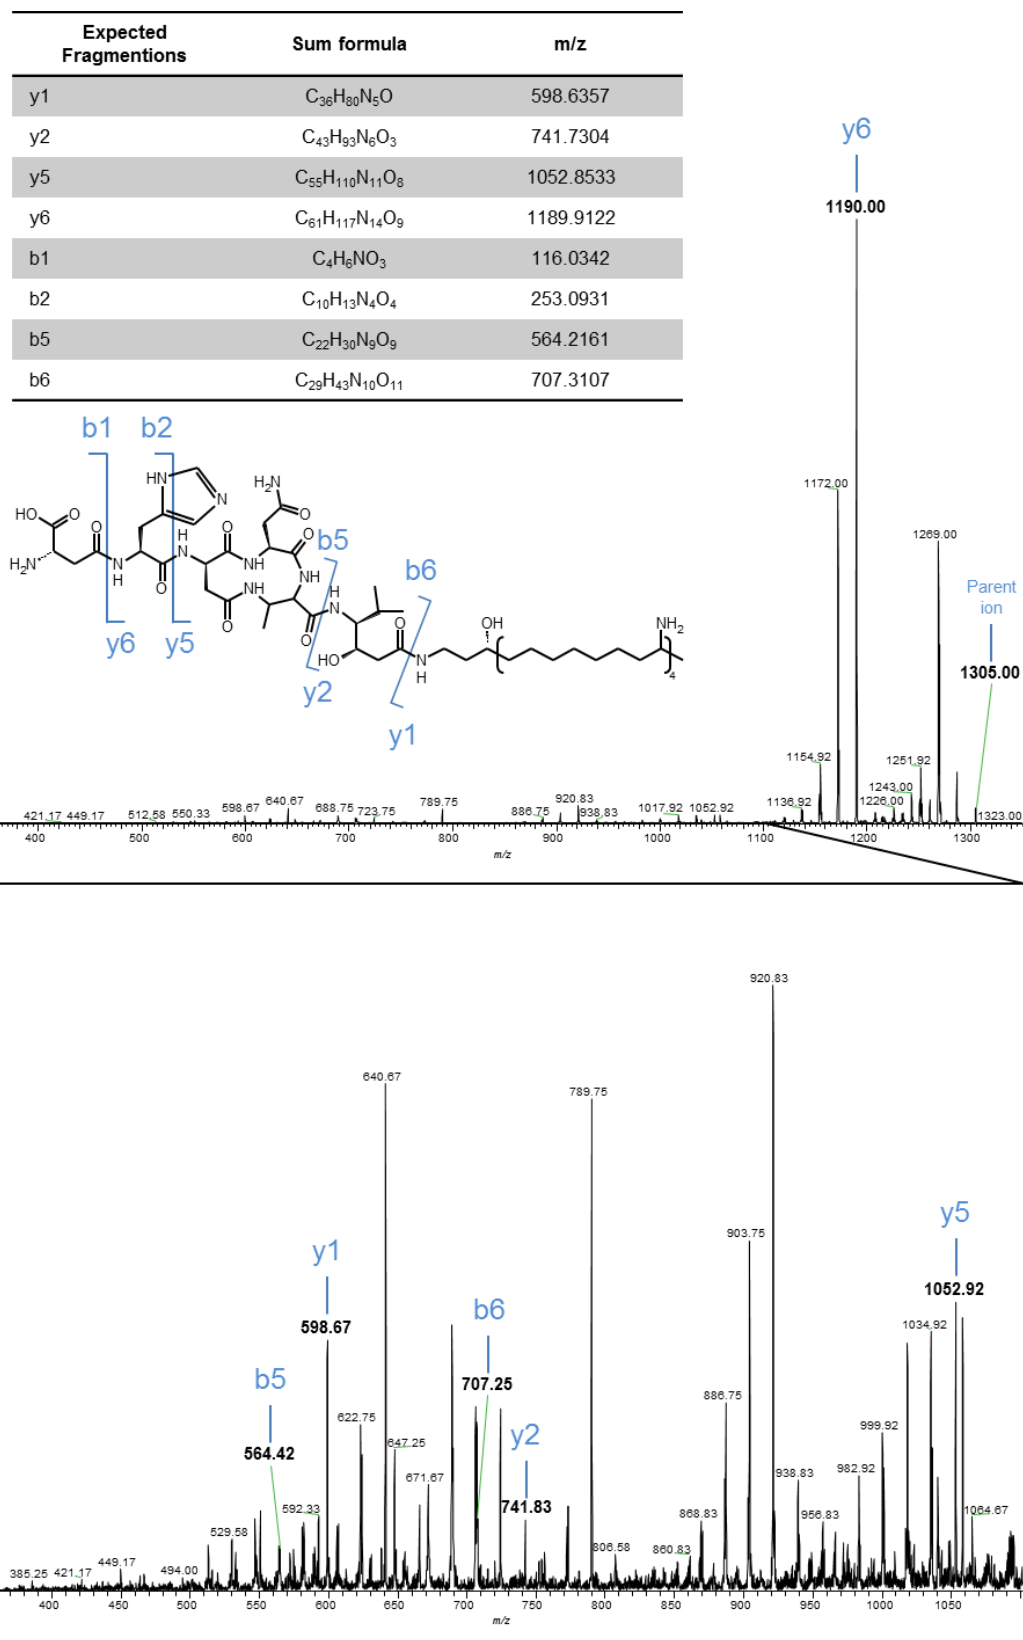

**Figure S23:** MALDI-MS<sup>2</sup> spectra of compound 1304.94 (**25**) of KJ12.1 pCEP\_*fl* (induced) showing expected fragment ions and proposed structure.

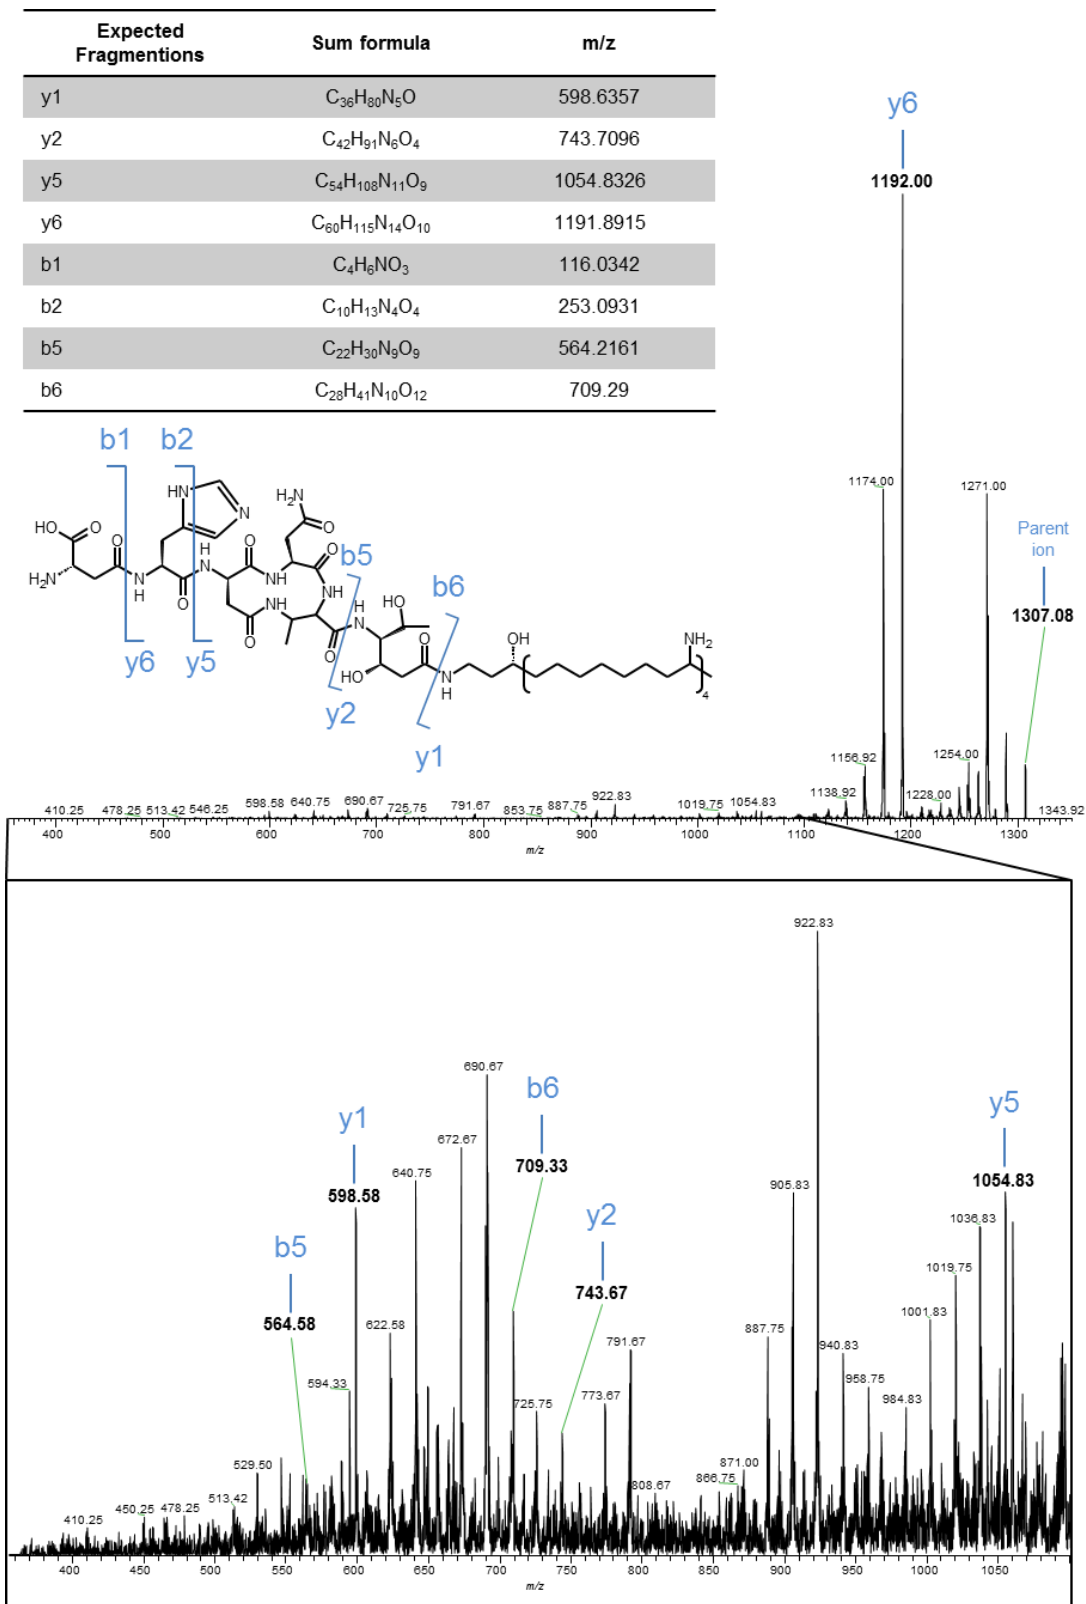

**Figure S24:** MALDI-MS<sup>2</sup> spectra of compound 1306.91 (**26**) of KJ12.1 pCEP\_fcl (induced) showing expected fragment ions and proposed structure.



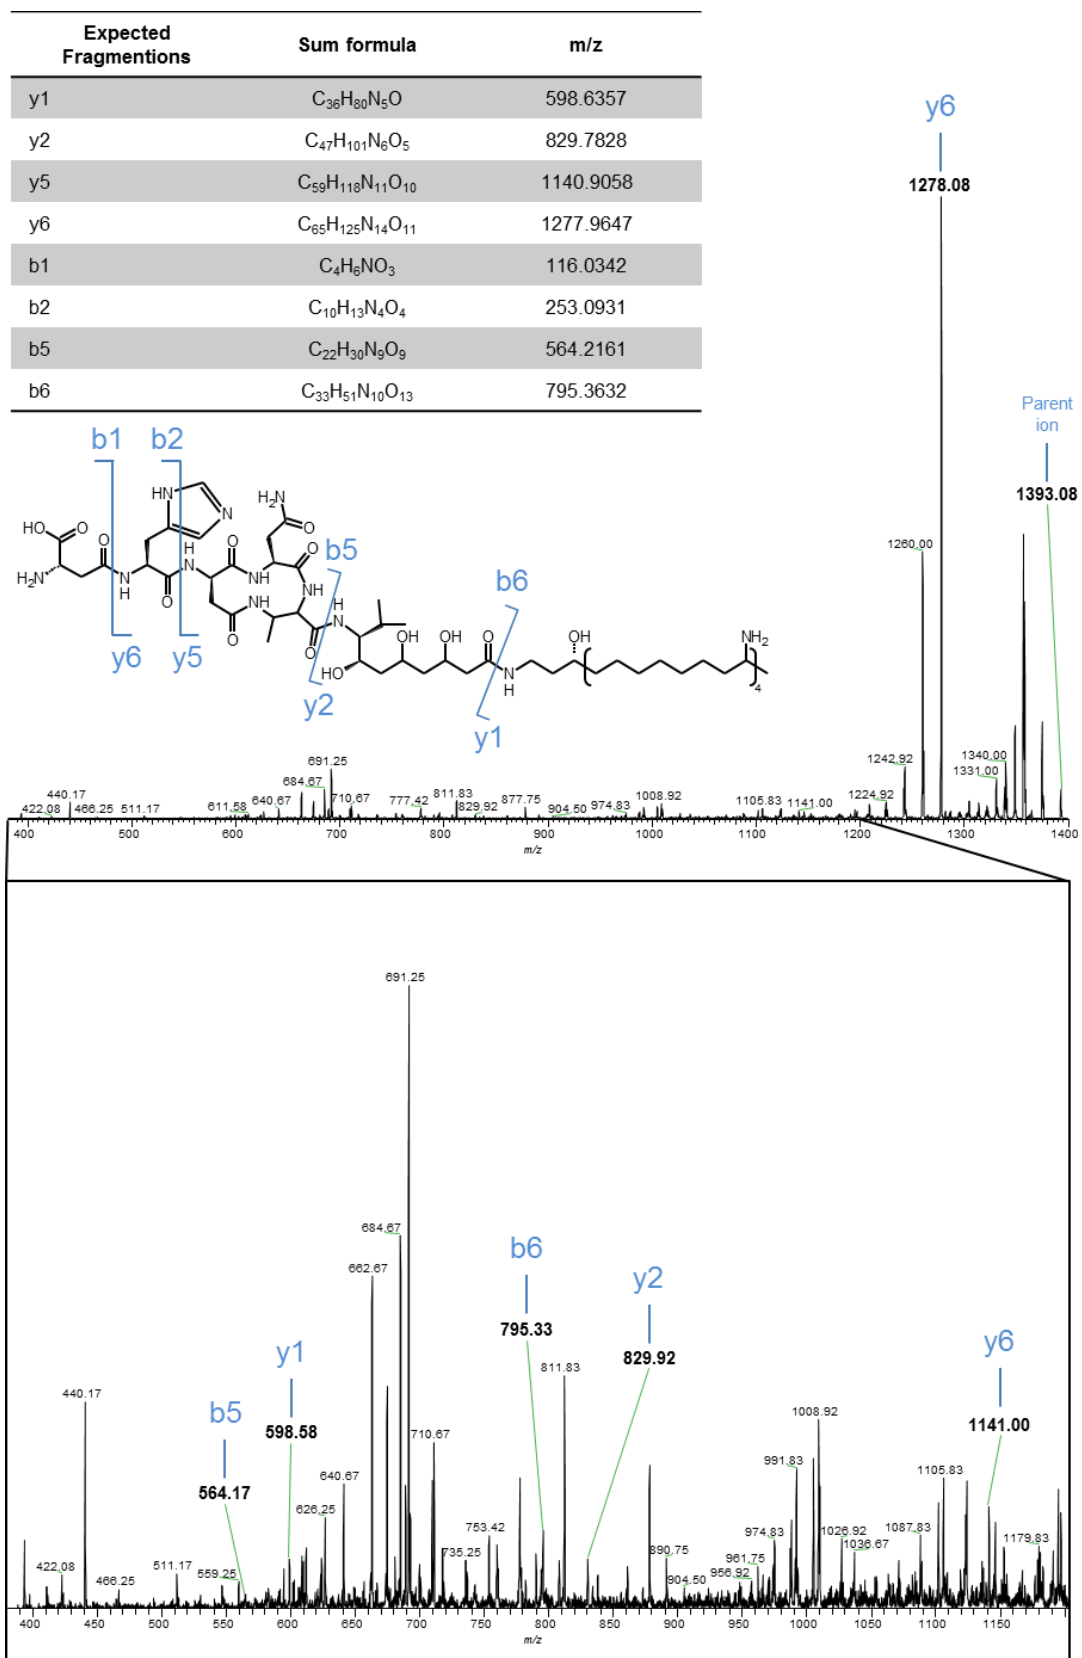

**Figure S25:** MALDI-MS<sup>2</sup> spectra of compound 1392.99 (31) of KJ12.1 pCEP<sub>fcI</sub> (induced) showing expected fragment ions and proposed structure.

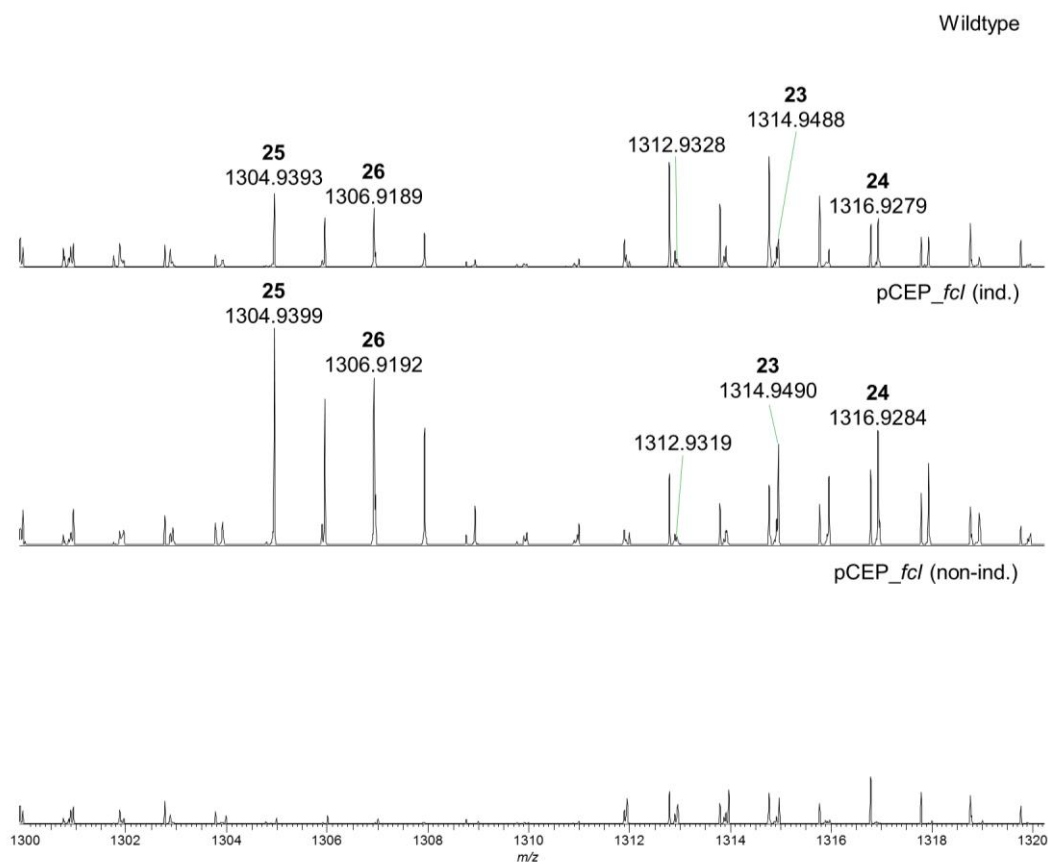

| #  | Sum formula                                                      | Calc. m/z | Det. m/z  |           | $\Delta$ ppm |          |
|----|------------------------------------------------------------------|-----------|-----------|-----------|--------------|----------|
|    |                                                                  |           | WT        | pCEP_fcl  | WT           | pCEP_fcl |
| 25 | C <sub>65</sub> H <sub>121</sub> N <sub>15</sub> O <sub>12</sub> | 1304.9392 | 1304.9393 | 1304.9399 | 0.046        | 0.521    |
| 26 | C <sub>64</sub> H <sub>119</sub> N <sub>15</sub> O <sub>13</sub> | 1306.9185 | 1306.9189 | 1306.9192 | 0.371        | 0.570    |
| -  | C <sub>68</sub> H <sub>121</sub> N <sub>13</sub> O <sub>12</sub> | 1312.9330 | 1312.9328 | 1312.9319 | -0.192       | -0.870   |
| 23 | C <sub>68</sub> H <sub>123</sub> N <sub>13</sub> O <sub>12</sub> | 1314.9487 | 1314.9488 | 1314.9490 | 0.112        | 0.241    |
| 24 | C <sub>67</sub> H <sub>121</sub> N <sub>13</sub> O <sub>13</sub> | 1316.9280 | 1316.9279 | 1316.9284 | -0.066       | 0.359    |

**Figure S26:** MALDI–HRMS spectra of *X. stockiae* wild type (WT) and pCEP\_fcl promoter-exchange mutant (induced and noninduced) with compounds **23–26** showing sum formulas, calculated and detected masses and corresponding  $\Delta$ ppm.

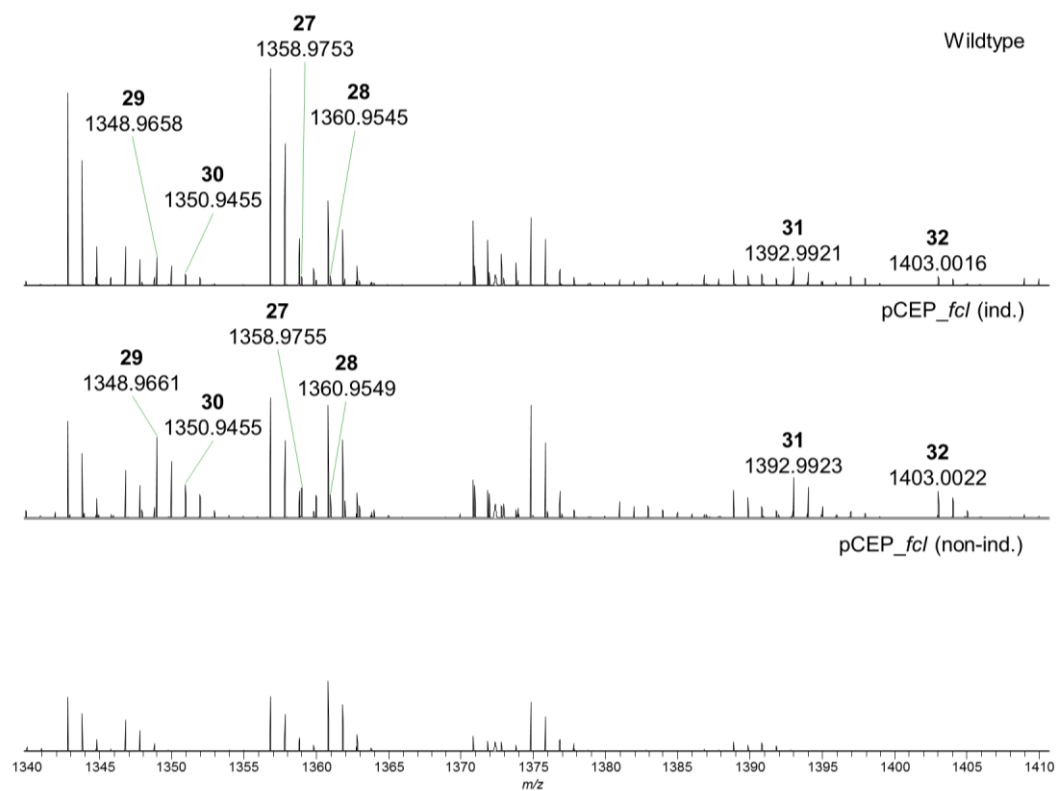

| #  | Sum formula                                                      | Calc. m/z | Det. m/z  |           | Δppm  |          |
|----|------------------------------------------------------------------|-----------|-----------|-----------|-------|----------|
|    |                                                                  |           | WT        | pCEP_fcl  | WT    | pCEP_fcl |
| 29 | C <sub>67</sub> H <sub>125</sub> N <sub>15</sub> O <sub>13</sub> | 1348.9654 | 1348.9658 | 1348.9661 | 0.285 | 0.545    |
| 30 | C <sub>66</sub> H <sub>123</sub> N <sub>15</sub> O <sub>14</sub> | 1350.9447 | 1350.9455 | 1350.9455 | 0.615 | 0.629    |
| 27 | C <sub>70</sub> H <sub>127</sub> N <sub>13</sub> O <sub>13</sub> | 1358.9749 | 1358.9753 | 1358.9755 | 0.318 | 0.429    |
| 28 | C <sub>69</sub> H <sub>125</sub> N <sub>13</sub> O <sub>14</sub> | 1360.9542 | 1360.9545 | 1360.9549 | 0.226 | 0.520    |
| 31 | C <sub>69</sub> H <sub>129</sub> N <sub>15</sub> O <sub>14</sub> | 1392.9916 | 1392.9922 | 1392.9923 | 0.381 | 0.467    |
| 32 | C <sub>72</sub> H <sub>131</sub> N <sub>13</sub> O <sub>14</sub> | 1403.0011 | 1403.0016 | 1403.0022 | 0.334 | 0.747    |

**Figure S27:** MALDI–HRMS spectra of *X. stockiae* wild type (WT) and pCEP\_fcl promoter-exchange mutant (induced and noninduced) with compounds **27–32** showing sum formulas, calculated and detected masses and corresponding Δppm.

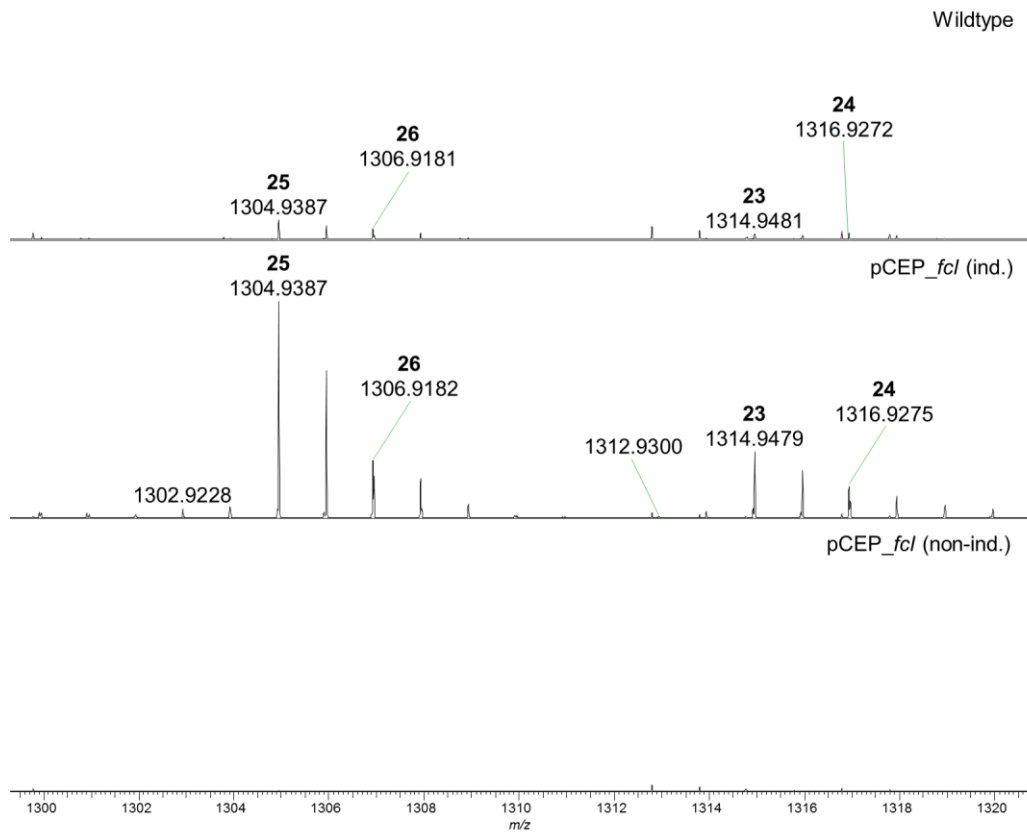

| #         | Sum formula                                                      | Calc. m/z | Det. m/z  |           | $\Delta$ ppm |          |
|-----------|------------------------------------------------------------------|-----------|-----------|-----------|--------------|----------|
|           |                                                                  |           | WT        | pCEP_fcl  | WT           | pCEP_fcl |
| -         | C <sub>65</sub> H <sub>119</sub> N <sub>15</sub> O <sub>12</sub> | 1302.9235 | 1302.9242 | 1302.9228 | 0.499        | -0.561   |
| <b>25</b> | C <sub>65</sub> H <sub>121</sub> N <sub>15</sub> O <sub>12</sub> | 1304.9392 | 1304.9387 | 1304.9387 | -0.407       | -0.361   |
| <b>26</b> | C <sub>64</sub> H <sub>119</sub> N <sub>15</sub> O <sub>13</sub> | 1306.9185 | 1306.9181 | 1306.9182 | -0.279       | -0.172   |
| -         | C <sub>68</sub> H <sub>121</sub> N <sub>13</sub> O <sub>12</sub> | 1312.9330 | 1312.9287 | 1312.9300 | -3.285       | -2.317   |
| <b>23</b> | C <sub>68</sub> H <sub>123</sub> N <sub>13</sub> O <sub>12</sub> | 1314.9487 | 1314.9481 | 1314.9479 | -0.489       | -0.587   |
| <b>24</b> | C <sub>67</sub> H <sub>121</sub> N <sub>13</sub> O <sub>13</sub> | 1316.928  | 1316.9272 | 1316.9275 | -0.544       | -0.324   |

**Figure S28:** MALDI-HRMS spectra of KK7.4 wild type (WT) and pCEP\_fcl promoter-exchange mutant (induced and noninduced) with compounds **23–26** showing sum formulas, calculated and detected masses and corresponding  $\Delta$ ppm.

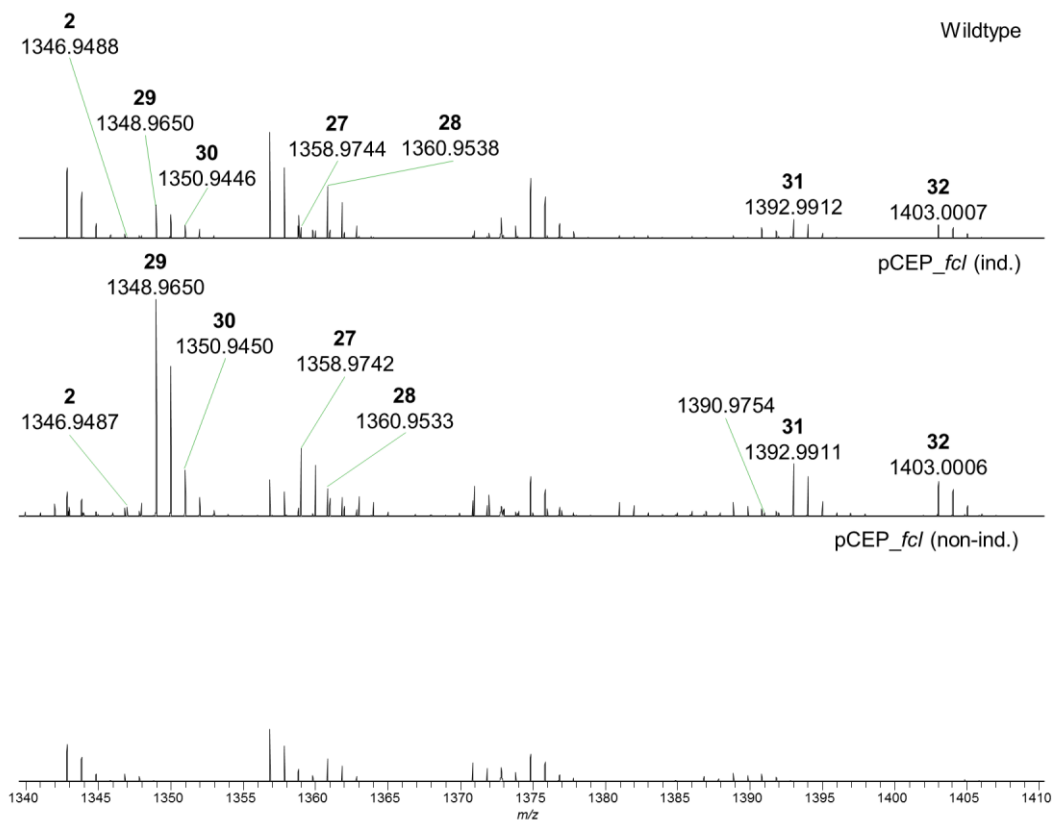

| #  | Sum formula                                                      | Calc. m/z | Det. m/z  |           | $\Delta$ ppm |          |
|----|------------------------------------------------------------------|-----------|-----------|-----------|--------------|----------|
|    |                                                                  |           | WT        | pCEP_fcl  | WT           | pCEP_fcl |
| 2  | C <sub>67</sub> H <sub>123</sub> N <sub>15</sub> O <sub>13</sub> | 1346.9498 | 1346.9488 | 1346.9487 | -0.731       | -0.791   |
| 29 | C <sub>67</sub> H <sub>125</sub> N <sub>15</sub> O <sub>13</sub> | 1348.9654 | 1348.9650 | 1348.9650 | -0.323       | -0.315   |
| 30 | C <sub>66</sub> H <sub>123</sub> N <sub>15</sub> O <sub>14</sub> | 1350.9447 | 1350.9446 | 1350.9450 | -0.037       | 0.244    |
| 27 | C <sub>70</sub> H <sub>127</sub> N <sub>13</sub> O <sub>13</sub> | 1358.9749 | 1358.9744 | 1358.9742 | -0.359       | -0.506   |
| 28 | C <sub>69</sub> H <sub>125</sub> N <sub>13</sub> O <sub>14</sub> | 1360.9542 | 1360.9538 | 1360.9533 | -0.273       | -0.670   |
| 31 | C <sub>69</sub> H <sub>129</sub> N <sub>15</sub> O <sub>14</sub> | 1392.9916 | 1392.9912 | 1392.9911 | -0.323       | -0.388   |
| -  | C <sub>69</sub> H <sub>127</sub> N <sub>15</sub> O <sub>14</sub> | 1390.976  | 1390.9767 | 1390.9754 | 0.539        | -0.410   |
| 32 | C <sub>72</sub> H <sub>131</sub> N <sub>13</sub> O <sub>14</sub> | 1403.0011 | 1403.0007 | 1403.0006 | -0.322       | -0.401   |

**Figure S29:** MALDI-HRMS spectra of KK7.4 wild type (WT) and pCEP\_fcl promoter-exchange mutant (induced and noninduced) with compounds **2** and **27–32** showing sum formulas, calculated and detected masses and corresponding  $\Delta$ ppm.

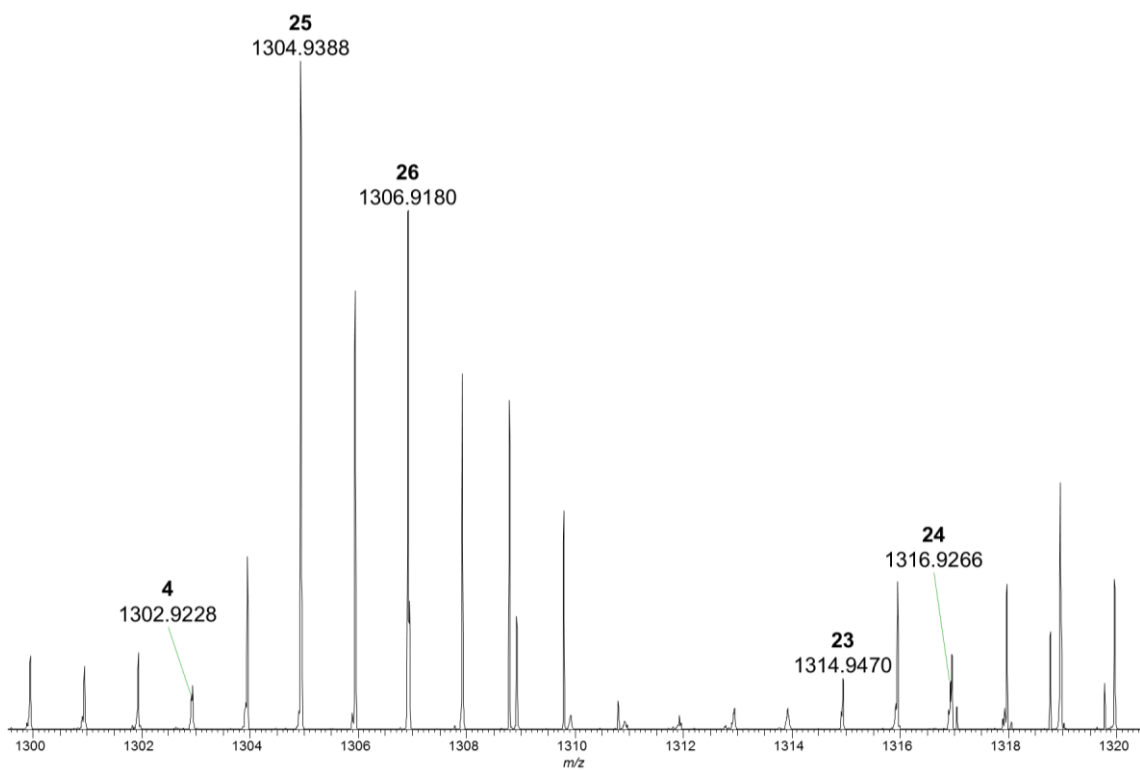

| #  | Sum formula                                                      | Calc. m/z | Det. m/z  | $\Delta$ ppm |
|----|------------------------------------------------------------------|-----------|-----------|--------------|
| 4  | C <sub>65</sub> H <sub>119</sub> N <sub>15</sub> O <sub>12</sub> | 1302.9235 | 1302.9228 | -0.607       |
| 25 | C <sub>65</sub> H <sub>121</sub> N <sub>15</sub> O <sub>12</sub> | 1304.9392 | 1304.9388 | -0.299       |
| 26 | C <sub>64</sub> H <sub>119</sub> N <sub>15</sub> O <sub>13</sub> | 1306.9185 | 1306.9180 | -0.356       |
| 23 | C <sub>68</sub> H <sub>123</sub> N <sub>13</sub> O <sub>12</sub> | 1314.9487 | 1314.9470 | -1.280       |
| 24 | C <sub>67</sub> H <sub>121</sub> N <sub>13</sub> O <sub>13</sub> | 1316.928  | 1316.9266 | -1.015       |

**Figure S30:** MALDI-HRMS spectra of *X. innexi* wild type with compounds **4** and **23–26** showing sum formulas, calculated and detected masses and corresponding  $\Delta$ ppm.

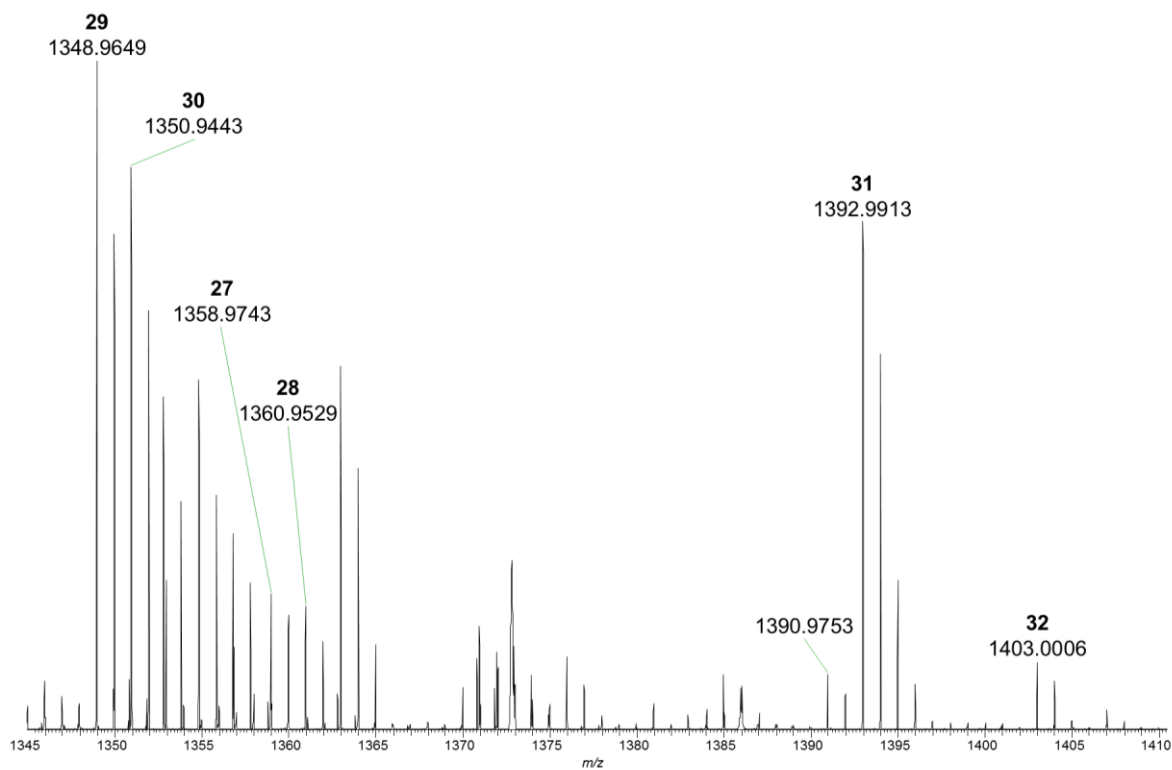

| #  | Sum formula                                                      | Calc. m/z | Det. m/z  | $\Delta$ ppm |
|----|------------------------------------------------------------------|-----------|-----------|--------------|
| 29 | C <sub>67</sub> H <sub>125</sub> N <sub>15</sub> O <sub>13</sub> | 1348.9654 | 1348.9649 | -0.374       |
| 30 | C <sub>66</sub> H <sub>123</sub> N <sub>15</sub> O <sub>14</sub> | 1350.9447 | 1350.9443 | -0.281       |
| 27 | C <sub>70</sub> H <sub>127</sub> N <sub>13</sub> O <sub>13</sub> | 1358.9749 | 1358.9743 | -0.462       |
| 28 | C <sub>69</sub> H <sub>125</sub> N <sub>13</sub> O <sub>14</sub> | 1360.9542 | 1360.9529 | -0.912       |
| -  | C <sub>69</sub> H <sub>127</sub> N <sub>15</sub> O <sub>14</sub> | 1390.976  | 1390.9753 | -0.460       |
| 31 | C <sub>69</sub> H <sub>129</sub> N <sub>15</sub> O <sub>14</sub> | 1392.9916 | 1392.9913 | -0.244       |
| 32 | C <sub>72</sub> H <sub>131</sub> N <sub>13</sub> O <sub>14</sub> | 1403.0011 | 1403.0006 | -0.351       |

**Figure S31:** MALDI–HRMS spectra of *X. innexi* wild type with compounds **27–32** showing sum formulas, calculated and detected masses and corresponding  $\Delta$ ppm.

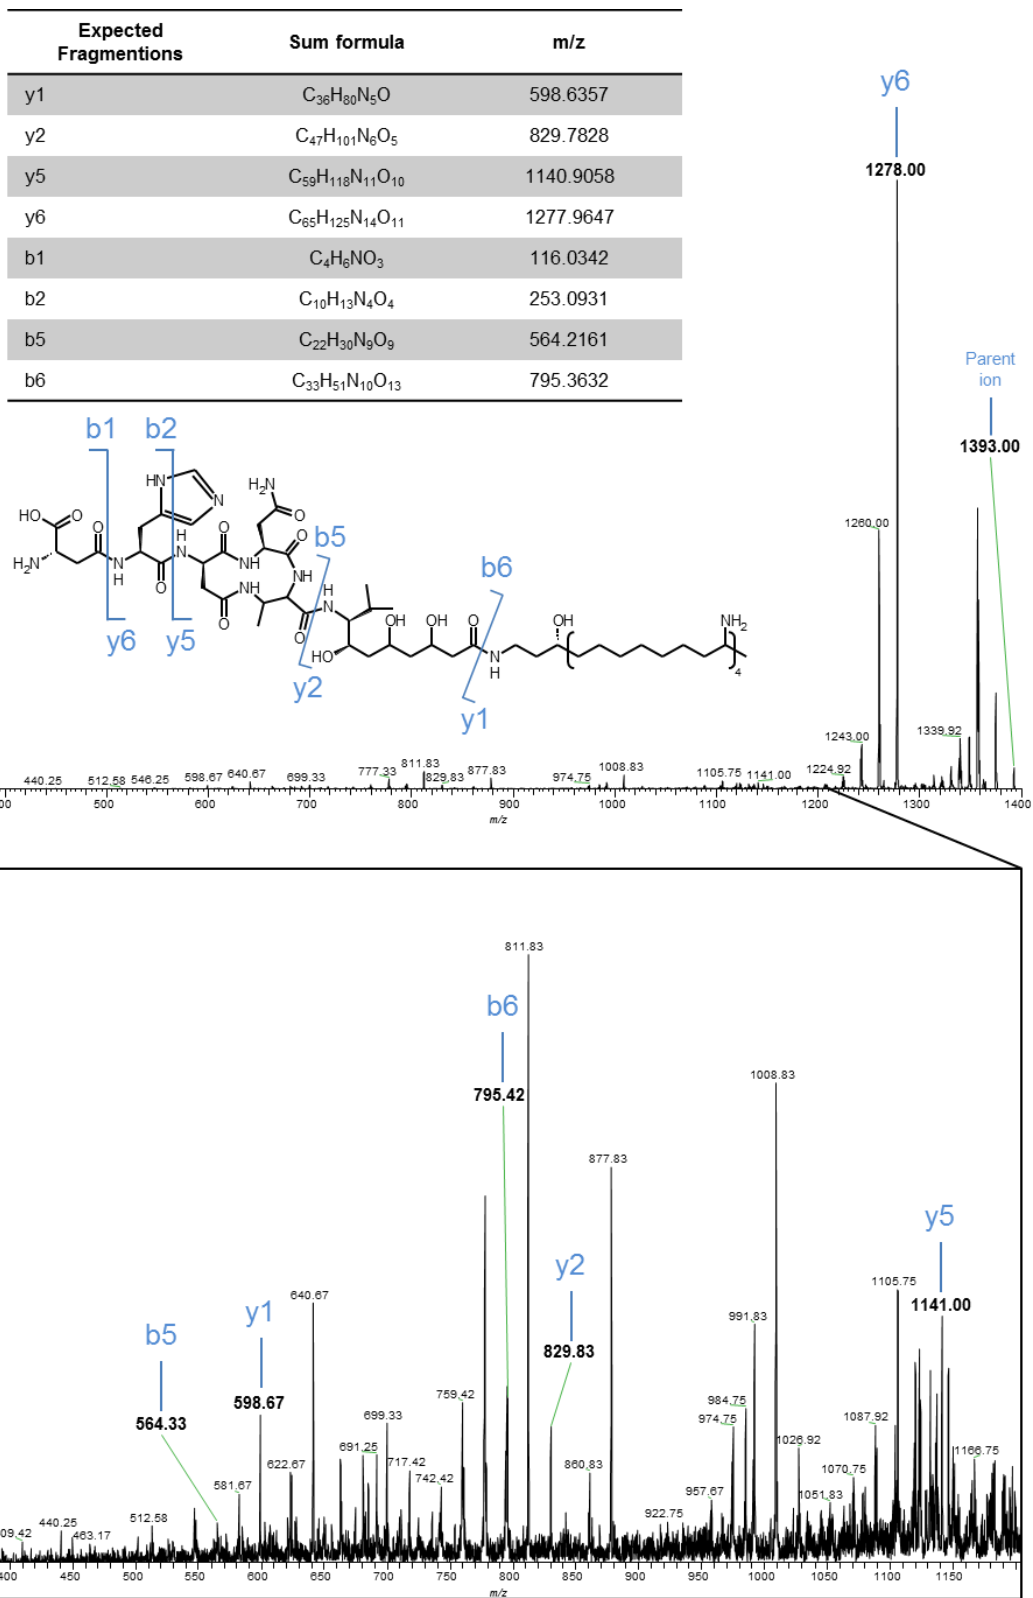

**Figure S32:** MALDI-MS<sup>2</sup> spectra of compound 1392.99 (**31**) of *X. innexi* showing expected fragment ions and proposed structure.



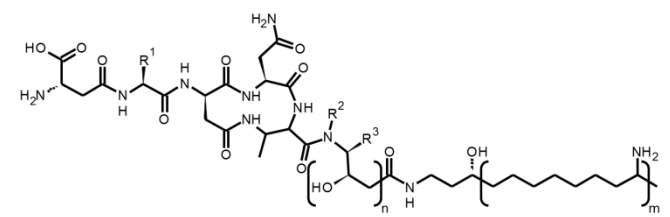

| Occurrence | R <sup>1</sup>                                                                    | R <sup>2</sup>                                                                    | R <sup>3</sup>                                                                    | n | m | Sum formula                                                      | [M+H] <sup>+</sup> |
|------------|-----------------------------------------------------------------------------------|-----------------------------------------------------------------------------------|-----------------------------------------------------------------------------------|---|---|------------------------------------------------------------------|--------------------|
| a          | CH <sub>3</sub>                                                                   | H                                                                                 |  | 2 | 3 | C <sub>56</sub> H <sub>106</sub> N <sub>12</sub> O <sub>13</sub> | 1155.8075          |
| a          | CH <sub>3</sub>                                                                   | H                                                                                 |  | 2 | 3 | C <sub>55</sub> H <sub>104</sub> N <sub>12</sub> O <sub>14</sub> | 1157.7868          |
| a          |  | H                                                                                 |  | 2 | 3 | C <sub>58</sub> H <sub>106</sub> N <sub>14</sub> O <sub>14</sub> | 1223.8086          |
| b          |  |  |  | 3 | 4 | C <sub>69</sub> H <sub>127</sub> N <sub>15</sub> O <sub>14</sub> | 1390.9760          |
| a          |  | H                                                                                 |  | 2 | 3 | C <sub>61</sub> H <sub>108</sub> N <sub>12</sub> O <sub>14</sub> | 1233.8181          |

**Figure S33:** Proposed minor derivatives found in *Xenorhabdus* strains (a: *X. szentirmaii*; b: KJ12.1, KK7.4). Identification is based on MALDI–HRMS spectra (Figure S2, S3, S22, and S29).

## References

1. Wenski, S. L.; Kolbert, D.; Grammbitter, G. L. C.; Bode, H. B. *J. Ind. Microbiol. Biotechnol.* **2019**, *46* (3-4), 565-572. doi:10.1007/s10295-018-02124-8
2. Bode, E.; Brachmann, A. O.; Kegler, C.; Simsek, R.; Dauth, C.; Zhou, Q.; Kaiser, M.; Klemmt, P.; Bode, H. B. *ChemBiochem* **2015**, *16* (7), 1115–1119. doi:10.1002/cbic.201500094
3. Simon, R.; Priefer, U.; Pühler, A. *Nat Biotechnol* **1983**, *1*, 784 EP -. doi:10.1038/nbt1183-784
4. Thoma, S.; Schobert, M. *FEMS Microbiol. Lett.* **2009**, *294* (2), 127–132. doi:10.1111/j.1574-6968.2009.01556.x
5. Fu, C.; Donovan, W. P.; Shikapwashya-Hasser, O.; Ye, X.; Cole, R. H. *PLoS ONE* **2014**, *9* (12), e115318. doi:10.1371/journal.pone.0115318
6. Agarwal, P.; Agarwal, N.; Gupta, R.; Gupta, M.; Sharma, B. *J Microb Biochem Technol* **2016**, *08* (05). doi:10.4172/1948-5948.1000316
7. Fang, X. L.; Li, Z. Z.; Wang, Y. H.; Zhang, X. *J. Appl. Microbiol.* **2011**, *111* (1), 145–154. doi:10.1111/j.1365-2672.2011.05033.x
8. Lengyel, K.; Lang, E.; Fodor, A.; Szállás, E.; Schumann, P.; Stackebrandt, E. *Syst. Appl. Microbiol.* **2005**, *28* (2), 115–122. doi:10.1016/j.syapm.2004.10.004
9. Tailliez, P.; Pagès, S.; Ginibre, N.; Boemare, N. *Int. J. Syst. Evol. Microbiol.* **2006**, *56* (Pt 12), 2805–2818. doi:10.1099/ijs.0.64287-0
10. Somvanshi, V. S.; Lang, E.; Ganguly, S.; Swiderski, J.; Saxena, A. K.; Stackebrandt, E. *Syst. Appl. Microbiol.* **2006**, *29* (7), 519–525. doi:10.1016/j.syapm.2006.01.004
11. Thanwisai, A.; Tandhavanant, S.; Saiprom, N.; Waterfield, N. R.; Ke Long, P.; Bode, H. B.; Peacock, S. J.; Chantratita, N. *PLoS ONE* **2012**, *7* (9), e43835. doi:10.1371/journal.pone.0043835
12. Tobias, N. J.; Wolff, H.; Djahanschiri, B.; Grundmann, F.; Kronenwerth, M.; Shi, Y.-M.; Simonyi, S.; Grün, P.; Shapiro-Ilan, D.; Pidot, S. J.; Stinear, T. P.; Ebersberger, I.; Bode, H. B. *Nat. Microbiol.* **2017**, *2* (12), 1676–1685. doi:10.1038/s41564-017-0039-9
13. Hurst, S. G.; Ghazal, S.; Morris, K.; Abebe-Akele, F.; Thomas, W. K.; Badr, U. M.; Hussein, M. A.; AbouZaied, M. A.; Khalil, K. M.; Tisa, L. S. *Genome Announc* **2014**, *2* (6). doi:10.1128/genomeA.01273-14
14. Donmez Ozkan, H.; Cimen, H.; Ulug, D.; Wenski, S.; Yigit Ozer, S.; Telli, M.; Aydin, N.; Bode, H. B.; Hazir, S. *Front Microbiol* **2019**, *10*, 2672. doi:10.3389/fmicb.2019.02672
15. Stachelhaus, T.; Mootz, H. D.; Marahiel, M. A. *Chem. Biol.* **1999**, *6* (8), 493-505. doi: 10.1016/S1074-5521(99)80082-9
16. Challis, G. L.; Ravel, J.; Townsend, C. A. *Chem. Biol.* **2000**, *7* (3), 211-224. doi: 10.1016/s1074-5521(00)00091-0. Kim, I.-H.; Aryal, S. K.; Aghai, D. T.; Casanova-Torres, Á. M.; Hillman, K.; Kozuch, M. P.; Mans, E. J.; Mauer, T. J.; Ogier, J.-C.; Ensign, J. C.; Gaudriault, S.; Goodman, W. G.; Goodrich-Blair, H.; Dillman, A. R. *BMC Genomics* **2017**, *18* (1), 927. doi:10.1186/s12864-017-4311-4
17. Kim, I.-H.; Aryal, S. K.; Aghai, D. T.; Casanova-Torres, Á. M.; Hillman, K.; Kozuch, M. P.; Mans, E. J.; Mauer, T. J.; Ogier, J.-C.; Ensign, J. C.; Gaudriault, S.; Goodman, W. G.; Goodrich-Blair, H.; Dillman, A. R. *BMC Genomics* **2017**, *18* (1), 927. doi:10.1186/s12864-017-4311-4
18. Masschelein, J.; Mattheus, W.; Gao, L.-J.; Moons, P.; van Houdt, R.; Uytterhoeven, B.; Lamberigts, C.; Lesclinier, E.; Rozenski, J.; Herdewijn, P.; Aertsen, A.; Michiels, C.; Lavigne, R. *PLoS ONE* **2013**, *8* (1), e54143. doi:10.1371/journal.pone.0054143

19. Masschelein, J.; Clauwers, C.; Awodi, U. R.; Stalmans, K.; Vermaelen, W.; Lescrinier, E.; Aertsen, A.; Michiels, C.; Challis, G. L.; Lavigne, R. *Chem. Sci.* **2015**, *6* (2), 923–929. doi:10.1039/c4sc01927j
20. Fuchs, S. W.; Grundmann, F.; Kurz, M.; Kaiser, M.; Bode, H. B. *Chembiochem* **2014**, *15* (4), 512–516. doi:10.1002/cbic.201300802
